1 **Title:** Oviposition of the mosquito *Aedes aegypti* in forest and domestic habitats in Africa

2

3 **Authors:** Siyang Xia<sup>1\*</sup>, Hany K. M. Dweck<sup>2</sup>, Joel Lutomiah<sup>3</sup>, Rosemary Sang<sup>3</sup>, Carolyn S. McBride<sup>4,5</sup>,

4 Noah H. Rose<sup>4</sup>, Diego Ayala<sup>6,7</sup>, Jeffrey R. Powell<sup>1</sup>

5 <sup>1</sup> Department of Ecology and Evolutionary Biology, Yale University, New Haven, CT, USA

6 <sup>2</sup> Department of Molecular, Cellular and Developmental Biology, Yale University, New Haven, CT, USA

7 <sup>3</sup> Arbovirus/Viral Hemorrhagic Fever Laboratory, Center for Virus Research, Kenya Medical Research

8 Institute, Nairobi, Kenya

9 <sup>4</sup> Department of Ecology & Evolutionary Biology, Princeton University, Princeton, NJ, USA

10 <sup>5</sup> Princeton Neuroscience Institute, Princeton University, Princeton, NJ, USA

11 <sup>6</sup> MIVEGEC, IRD, CNRS, Univ. Montpellier, Montpellier, France

12 <sup>7</sup> CIRMF, Franceville, Gabon

13 \* Corresponding author: 21 Sachem Street, ESC 158, New Haven, CT, 06511, [siyang.xia@yale.edu](mailto:siyang.xia@yale.edu)

14

15 **Abstract**

16 The theory of ecological divergence provides a useful framework to understand the adaptation of many  
17 species to anthropogenic ('domestic') habitats. The mosquito *Aedes aegypti*, a global vector of several  
18 arboviral diseases, presents an excellent study system. *Ae. aegypti* originated in African forests, but the  
19 populations that invaded other continents have specialized in domestic habitats. In its African native  
20 range, the species can be found in both forest and domestic habitats like villages. A crucial behavioral  
21 change between mosquitoes living in different habitats is their oviposition choices. Forest *Ae. aegypti* lay  
22 eggs in natural water containers like tree holes, while their domestic counterparts heavily rely on artificial  
23 containers such as plastic buckets. These habitat-specific containers likely have different environmental  
24 conditions, which could drive the incipient divergent evolution of oviposition in African *Ae. aegypti*. To  
25 examine this hypothesis, we conducted field research in two African locations, La Lopé, Gabon and  
26 Rabai, Kenya, where *Ae. aegypti* live in both forests and nearby villages. We first characterized a series of  
27 environmental conditions of natural oviposition sites, including physical characteristics, microbial  
28 density, bacterial composition, and volatile profiles. Our data showed that in both locations,  
29 environmental conditions of oviposition sites did differ between habitats. To examine potential behavioral  
30 divergence, we then conducted field and laboratory oviposition choice experiments to compare the  
31 oviposition preference of forest and village mosquitoes. The field experiment suggested that forest  
32 mosquitoes readily accepted artificial containers. In laboratory oviposition assays, forest and village  
33 mosquito colonies did not show a differential preference towards several conditions that featured forest  
34 versus village oviposition sites. Collectively, there is little evidence from our study that environmental  
35 differences lead to strong and easily measurable divergence in oviposition behavior between *Ae. aegypti*  
36 that occupy nearby forest and domestic habitats within Africa, despite clear divergence between African  
37 and non-African *Ae. aegypti*.

38

39 **Keywords:** *Aedes aegypti*, oviposition, forest and domestic habitat, Africa, environmental conditions,  
40 choice assays  
41

## 42 **Introduction**

43           Ecological divergence is one of the central mechanisms contributing to biodiversity (Nosil, 2012).  
44           When descendants of the same ancestral population evolve in different environments, they may  
45           experience divergent selection pressures leading to morphological and/or behavioral divergence (Schluter,  
46           2000). Accumulation of these phenotypic changes and their underlying genetic components, along with  
47           genetic drift, could further result in reproductive isolation and speciation (Nosil, 2012; Rundle & Nosil,  
48           2005; Shafer & Wolf, 2013). A core step in this process is the ecologically-based divergent selection  
49           (Rundle & Nosil, 2005), which can be recognized by two essential features: consistently distinct  
50           environmental conditions and organisms' corresponding phenotypic adaptations. The attribution of  
51           phenotypic change to ecological selection has been demonstrated in several natural populations, such as  
52           Darwin's finches (Grant & Grant, 2002, 2011), stickleback fish (Hatfield & Schluter, 1999), beach mice  
53           (Mullen, Vignieri, Gore, & Hoekstra, 2009), and *Timema cristinae* walking-sticks (Nosil, 2007; Nosil &  
54           Crespi, 2004).

55           In addition to explaining biodiversity, the model of ecological divergence also provides a useful  
56           framework for understanding the evolution of a particular group of organisms – disease vectors living  
57           with humans, such as mosquitoes. Many of these vector species experienced a transition from their  
58           natural habitats into anthropogenic domestic habitats (e.g., villages and urban areas) following the  
59           development of human civilization (Hulme-Beaman, Dobney, Cucchi, & Searle, 2016; Otto, 2018). The  
60           striking contrast between these two types of habitats suggests a potentially strong divergent selection  
61           (Johnson & Munshi-South, 2017). Alternatively, some vectors species may be predisposed to using  
62           domestic habitats, in which case one would expect little phenotypic changes. Few studies have examined  
63           these hypotheses or demonstrated how these disease vector species react and adapt to the 'novel'  
64           environmental conditions of the domestic habitats. Addressing this question will contribute to our  
65           understanding of the unique evolutionary history of these epidemiologically important animals, and  
66           provide valuable information on why they are so good at living around humans and transmitting diseases.

67           The mosquito *Aedes aegypti* provides an excellent model for studying ecological divergence in  
68 disease vectors. The species is the main vector of yellow fever, dengue, chikungunya (World Health  
69 Organization, 2014), and Zika virus (Li, Wong, Ng, & Tan, 2012; Marcondes & Ximenes, 2016). Genetic  
70 data suggested that *Ae. aegypti* is native to Africa (Brown et al., 2011; Gloria-Soria et al., 2016; Powell,  
71 Gloria-Soria, & Kotsakiozi, 2018). With the establishment of human settlements, they invaded human-  
72 generated domestic habitats inside Africa, probably five to ten thousand years ago (Crawford et al., 2017;  
73 Kotsakiozi, Evans, et al., 2018), and later spread to the rest of the world since the 15<sup>th</sup> century (Brown et  
74 al., 2014; Powell et al., 2018; Powell & Tabachnick, 2013). The mosquitoes in and out of Africa showed  
75 a relatively clear genetic distinction (but see exceptions in Kotsakiozi et al. 2018 and Rose et al. 2020),  
76 which roughly matches the two classical subspecies: *Ae. aegypti formosus* (Aaf) and *Ae. aegypti aegypti*  
77 (Aaa), respectively. Complexities exist in this subspecies definition (Powell & Tabachnick, 2013), and in  
78 this paper, we refer to them simply based on their geographic range (in or out of Africa). Non-African  
79 Aaa breed in human environments, e.g., live specifically in urban areas with only a few exceptions in the  
80 Caribbean and Argentina (Chadee, Ward, & Novak, 1998; Mangudo, Aparicio, & Gleiser, 2015). They  
81 also display a strong preference for human hosts (McBride et al., 2014; Rose et al., 2020) and use  
82 artificial containers as breedings sites (Day, 2016).

83           However, relatively little is known about the initial process of colonizing domestic environments  
84 inside Africa, except for a few recent studies. For example, Rose et al. (2020) found that the mosquito's  
85 preference towards humans is closely associated with seasonality and human density. *Ae. aegypti*  
86 throughout Africa (Aaf) can be found in both forests, the presumed ancestral habitats, and domestic  
87 settings like villages. Previous studies showed that domestic Aaf in several locations inside Africa is  
88 genetically similar to their local forest counterparts, suggesting a relatively recent invasion into domestic  
89 habitats (Kotsakiozi, Evans, et al., 2018; Paupy et al., 2014; Sylla, Bosio, Urdaneta-Marquez, Ndiaye, &  
90 Black IV, 2009). Comparing Aaf between different habitats could allow us to understand the potential

91 incipient divergence. For example, what were the original selective pressures that may have ultimately led  
92 to the clear divergence between Aaf and Aaa?

93           From a behavioral perspective, one of the critical steps during the process of colonizing domestic  
94 habitats and invading other tropical regions around the world is adapting to lay eggs (i.e., oviposit) in  
95 domestic breeding sites. After taking a full blood meal, which is necessary for reproduction, *Ae. aegypti*  
96 females lay eggs on substrates at the edge of small containers of water, i.e., oviposition sites  
97 (Christophers, 1960). Aaf in African forest and domestic habitats utilize different oviposition sites: the  
98 former lay eggs mainly in natural containers like water-filled tree holes and rock pools (Lounibos, 1981),  
99 while the latter uses mostly artificial containers, such as plastic buckets, tires, and discarded tin cans  
100 (McBride et al., 2014; Petersen, 1977; Trpis & Hausermann, 1978). This difference in oviposition site use  
101 is at least partly a function of container availability in the two habitats. However, natural and artificial  
102 containers likely have different characteristics (Yee, Allgood, Kneitel, & Kuehn, 2012), such as bacterial  
103 profiles (Dickson et al., 2017), that could also drive genetically based divergence in container preference.  
104 Such divergence likely exists between Aaa and Aaf, as shown in studies comparing Aaf and a once  
105 existed Aaa introduced to coastal Kenya from non-African populations (Leahy, VandeHey, & Booth,  
106 1978; Petersen, 1977). Whether a similar divergence also exists within Aaf remains mostly unclear.

107           Conversely, ovipositional modifications could have a significant effect on the evolution of the  
108 mosquitoes. If forest and domestic Aaf actively prefer natural and artificial containers, respectively, it  
109 could facilitate the isolation between them: selective oviposition could keep forest populations in the  
110 forest and domestic populations close to humans, which reduces gene flow between them and promotes  
111 other adaptations (Servedio, Van Doorn, Kopp, Frame, & Nosil, 2011). Therefore, the evolution of  
112 oviposition behaviors could be a key factor in understanding how *Ae. aegypti* became domesticated  
113 (Powell et al., 2018; Rose et al., 2020). This process is of particular interest in the initial colonization of  
114 domestic habitat within Africa. How different are the oviposition sites in the forest versus domestic

115 habitats? Was Aaf an ovipositional generalist, pre-adapted to jump into human environments? Or are  
116 there genetically-based differences between populations breeding in wild and human environments?

117 *Ae. aegypti* choose oviposition sites based on the interactions between their innate preference and  
118 external oviposition cues. Various abiotic and biotic factors have been shown to influence oviposition  
119 choices of *Ae. aegypti* (Day, 2016), including container size (Bond & Fay, 1969; Burkot et al., 2007;  
120 Harrington, Ponlawat, Edman, Scott, & Vermeyley, 2008), shading (Barrera, Amador, & Clark, 2006;  
121 Prado, Maciel, Leite, & Souza, 2017), water salinity (Matthews, Younger, & Vosshall, 2019), color and  
122 texture of the sites (Bentley & Day, 1989; Fay & Perry, 1965), presence of conspecific eggs, larvae, and  
123 pupae (Zahiri, Rau, & Lewis, 1997, 1997), predators (Albeny-Simoes et al., 2014; Pamplona Lde,  
124 Alencar, Lima, & Heukelbach, 2009), bacterial density and community composition (Arbaoui & Chua,  
125 2014; Hazard, Mayer, & Savage, 1967; Ponnusamy, Schal, Wesson, Arellano, & Apperson, 2015), and  
126 chemical components (Afify & Galizia, 2015; Melo et al., 2019). However, most of the existing studies  
127 were conducted in laboratory settings with artificial oviposition choices. Although these studies provided  
128 rich knowledge on the sensory mechanisms of oviposition (Matthews et al., 2019; Ponnusamy et al.,  
129 2015), the conditions examined in these studies may not necessarily reflect the characteristics of breeding  
130 sites in the field. These studies are also heavily biased to Aaa, while detailed examination of oviposition  
131 preference in Aaf is mostly missing, let alone comparisons between forest and domestic Aaf. As a result,  
132 it is still unclear how oviposition behaviors evolved during the domestication of *Ae. aegypti*.

133 As a first step to address this question, we examined oviposition of *Ae. aegypti* living in forest  
134 and domestic habitats in two locations in Africa, La Lopé in Gabon and Rabai in Kenya. Mosquitoes in  
135 both locations are Aaf, but can be found in forest and villages in close proximity. They also showed little  
136 genetic differentiation between habitats (Xia et al., submitted), which suggested gene flow between forest  
137 and domestic populations. We first characterized the environmental conditions of natural oviposition  
138 sites, including physical characteristics, competition and predation, bacterial profiles, and chemical  
139 volatiles, in natural sites (tree holes) and artificial containers. To examine whether environmental

140 differences may translate into behavioral differences, we then investigated the oviposition preference of  
141 forest and domestic Aaf through field oviposition experiments and laboratory oviposition assays. The  
142 results could also provide useful information on identifying the critical environmental variables that  
143 potentially drove the divergent evolution of oviposition, if such behavioral divergence exists.

144 We hypothesized that natural and artificial containers represent very different environmental  
145 characteristics, and that both forest and domestic Aaf will prefer conditions that are more alike the  
146 oviposition sites from their own habitats, as would be predicted under a model of ecological divergence  
147 and local adaptation. By examining the two main elements of ecological divergence, environmental  
148 variation and behavioral differences, this study provides valuable information on how oviposition  
149 behaviors in *Ae. aegypti* evolved during the domestication history of the mosquito.

150

## 151 **Materials and methods**

### 152 *Field study*

153 We conducted field studies in La Lopé, Gabon in Central Africa from November to December  
154 2016, and in Rabai, Kenya in East Africa from April to May 2017. La Lopé has an extensive continuous  
155 tropical rainforest surrounding La Lopé village (Figure 1a). The forest in Rabai, on the other hand, is  
156 more fragmented, with several villages scattered around the forest patch (Figure 1b). In each location, we  
157 searched for water-holding containers as potential mosquito oviposition sites in both the forests and  
158 nearby villages. A potential oviposition site was defined as one that holds at least one mosquito larva (not  
159 necessarily *Ae. aegypti*) at the time of sampling, which suggested that the site had been present long  
160 enough for a mosquito to lay eggs. We categorized oviposition sites into three habitat groups: forest,  
161 peridomestic (outdoor containers in a village area), and domestic (indoor containers) (Table 1). We  
162 separated indoor and outdoor containers as classical studies from the 1970s reported that, at least in  
163 Rabai, Kenya, the mosquitoes living indoor and outdoor showed distinct behavioral and genetic



164 difference (Leahy et al., 1978; McBride et al., 2014; Petersen, 1977; Tabachnick, Munstermann, &  
165 Powell, 1979; Trpis & Hausermann, 1975). Genetic analysis showed that these indoor mosquitoes in  
166 Rabai were likely descendent of non-African *Aaa*, which is a unique case in the evolutionary history of  
167 *Ae. aegypti* (Brown et al., 2011; Gloria-Soria et al., 2016). However, this previously described *Aaa*-like  
168 indoor form was no longer found at the time of sampling, which is also supported by genetic data (Xia et  
169 al., submitted).

170 In La Lopé, we visited 60 oviposition sites in seven forest locations, and 38 sites in six village  
171 locations. The sampling sites separate by 5-17 km. Forest oviposition sites were predominantly rock pools  
172 around streams and tree holes that accumulated water. In the village, mosquito larvae were found in a  
173 variety of artificial containers, including construction bricks, tires, metal cans, and plastic containers.  
174 Because residents in the village rarely store water indoor, all village oviposition sites were ‘peridomestic.’  
175 In Rabai, Kenya, we sampled 31 oviposition sites consisting of mainly plastic buckets, earthenware pots,  
176 and metal barrels in four villages. They were mostly indoor (i.e., domestic) containers. The 37 oviposition  
177 sites in Rabai forest were all tree holes holding rainwater (Figure 1b). We recorded the GPS coordinates  
178 of each sampling location (which may consist of more than one oviposition sites) in La Lopé, and of each  
179 oviposition site in Rabai, Kenya (Figure 1).

180 Upon identifying a potential oviposition site in any habitat, we measured 11-16 physical  
181 variables. We also collected water samples for further analysis of bacterial and chemical volatile profiles.  
182 Method details are described in the following sections and the Appendix. In addition, we collected all  
183 mosquito larvae using pipets and reared them to adults in field stations, keeping larvae and pupae from  
184 different oviposition sites separate. Upon eclosion, the adults were identified to species or genus based on  
185 taxonomic keys using a dissection microscope in the field. We kept *Ae. aegypti* adults alive to establish  
186 lab colonies for future behavioral tests. We categorized each site as ‘*Ae. aegypti* present’ or ‘*Ae. aegypti*  
187 absent’ based on whether it held any *Ae. aegypti* larvae or pupae (Table 1). It is worth noting that the  
188 absence of *Ae. aegypti* may not necessarily suggest an avoidance. Some sites may be suitable for

189 oviposition but not yet colonized by *Ae. aegypti* at the time of collection. The combinations of habitats  
190 and *Ae. aegypti* presence will be referred to as ‘oviposition site groups’ in the rest of the paper for the  
191 purpose of communication. We summarized the sample sizes for analyses of different environmental  
192 variables in Table 1. Almost all peridomestic and domestic habitats in Rabai were present with *Ae.*  
193 *aegypti*. This mainly results from the fact that there were rarely other species present in these  
194 environments, but we required at least one mosquito larvae to include the site in the dataset, so there are  
195 effectively no ‘*Ae aegypti* absent’ sites. Because the peridomestic *Ae. aegypti* absent group contained only  
196 one sample, it is excluded from group-level analyses, but retained in comparisons between habitats or  
197 between *Ae. aegypti* present vs. absent sites.

198         The fieldwork in La Lopé was approved by the CENAREST with the authorization  
199 AR0013/16/MESRS/CENAREST/CG/CST/CSAR, and by the La Lopé National Parks with the  
200 authorization AE16008/PR/ANPN/SE/CS/AEPN. The fieldwork in Rabai was approved by the Kenya  
201 Medical Research Institute Scientific and Ethical Review Unit with the authorization  
202 KEMRI/SERU/3433.

### 203 *Characterizing oviposition sites: physical variables*

204         We measured 11 physical variables for each oviposition site in La Lopé, Gabon, and five  
205 additional variables in Rabai, Kenya (Table S1 in Appendix). The variables were selected partially based  
206 on previous laboratory studies of mosquito oviposition (Harrington et al., 2008; Madeira, Macharelli, &  
207 Carvalho, 2002; Petersen, 1977; Reiskind & Zarrabi, 2012; Wong, Stoddard, Astete, Morrison, & Scott,  
208 2011), as well as the availability of equipment and resources in the field. These variables include the size  
209 of the oviposition sites (e.g., diameters, circumference, surface area, volume, container depth, water  
210 depth, etc.), ambient environments (temperature, relative humidity, and canopy coverage), and water  
211 characteristics (pH, conductivity, salinity, water temperature, and total dissolved solids). Methodological  
212 details can be found in Table S1 in the Appendix.

213           After removing eight oviposition sites with excessive missing data, we first compared each  
214 variable individually across oviposition site groups. Because our data do not follow a normal distribution,  
215 we used the Kruskal–Wallis test and post hoc pairwise Wilcoxon rank sum test in R v3.5.0 (R  
216 development core team, 2018) with *Holm* correction for multiple comparisons. We then tested the  
217 difference between habitats or between *Ae. aegypti* present and absent sites separately, regardless of the  
218 other grouping factors. We also performed a principal component analysis (PCA) to summarize all  
219 physical variables. The multivariate differences between oviposition site groups, habitats, and *Ae. aegypti*  
220 presence status were tested by multiple response permutation procedure (MRPP) with 999 permutations.  
221 The p values for multiple comparisons were adjusted using the *Holm* method. Lastly, we attempted to  
222 identify the variables that are most differentiated in each comparison by ranking variable importance  
223 using a random forest algorithm in R package *randomForest v4.6-14* (Liaw & Wiener, 2002). Random  
224 forest is a decision-tree based classification algorithm that works well with small sample size and  
225 correlated variables (Qi, 2012).

#### 226 *Characterizing oviposition sites: competition and predation*

227           Competition and predation could influence larval development and female oviposition choice  
228 (Pamplona Lde et al., 2009; Soman & Reuben, 1970; Vonesh & Blaustein, 2010; Zahiri & Rau, 1998). To  
229 consider their effects, we counted the number of individual mosquitoes (*Ae. aegypti* as well as other  
230 mosquito species) present in each oviposition site. We also noted the presence of predatory larvae,  
231 predominately *Toxorhynchites* mosquitoes, and removed them immediately if found. We first compared  
232 the number and density of *Ae. aegypti* between habitats, using only the oviposition sites where *Ae. aegypti*  
233 was present. We also carried out an additional analysis that used mosquitoes of all species (including *Ae.*  
234 *aegypti*) to include possible interspecific competition effects, and included oviposition sites without *Ae.*  
235 *aegypti*. In La Lopé, records of other mosquito species were only available for the forest, so we only  
236 compared forest sites present versus absent of *Ae. aegypti*. We used negative-binomial models to compare  
237 mosquito numbers with habitat as the predictors, and used Kruskal–Wallis tests and *post hoc* pairwise

238 Wilcoxon rank sum tests to compare mosquito density. In addition, we analyzed the frequency of finding  
239 predators in different oviposition site groups or habitats with chi-squared tests.

#### 240 *Characterizing oviposition sites: microbial density*

241 We examined the microbial profile in a subset of oviposition sites, inspired by previous studies  
242 showing that the microbiome, particularly bacteria, affect *Ae. aegypti* oviposition (Arbaoui & Chua, 2014;  
243 Ponnusamy et al., 2015). We collected 15 mL (in La Lopé) or 50 mL (in Rabai) water samples from each  
244 field oviposition site using sterile pipets and conical tubes (Thermo Scientific, USA). This procedure was  
245 performed before measuring physical characteristics to avoid contamination. We kept the water samples  
246 in a cooler with ice packs in the field until returning to the field station. To measure microbial density, we  
247 added an aliquot of each water sample to formaldehyde solution (Millipore Sigma, USA) with a final  
248 concentration of 1% - 3% formaldehyde and kept it in 4 °C. After returning to Yale University, we  
249 stained the formaldehyde preserves with DAPI (4',6-diamidino-2-phenylindole, final concentration 5  
250 ug/mL, Thermo Scientific, USA), and counted the microbial cells using hemocytometers (DHC-N01,  
251 INCYTO, Korea) under a widefield fluorescence microscope (Leica DMI8, Leica, German) Densities  
252 were log-transformed before statistical analysis. We then compared the microbial density among  
253 oviposition site groups in La Lopé with the Kruskal–Wallis test and post hoc pairwise Wilcoxon rank sum  
254 tests. The distribution of data in Rabai samples did not violate parametric test assumptions, so we  
255 performed the comparisons using analysis of variance (ANOVA) and *post hoc* Tukey tests.

#### 256 *Characterizing oviposition sites: bacterial community composition*

257 In addition to the overall density, we performed 16s-rRNA gene amplicon sequencing to explore  
258 the bacterial community composition in most oviposition sites (Table 1), inspired by previous studies  
259 suggested different bacteria between habitats (Dickson et al., 2017). The details of sample processing and  
260 sequencing library preparation are described in the Appendix. In short, we collected cells from the water  
261 samples by centrifuge or filtering, extracted DNA, and amplified the 16s-rRNA gene V4 region using

262 primers reported in Kozich et al. (2013) . The primers label each sample with a unique combination of  
263 index sequences. The PCR products were cleaned and mixed with equal quantity and sequenced on  
264 Illumina MiSeq (Illumina, USA) at the Yale Center for Genome Analysis. We also included commercial  
265 mock communities of bacteria in our library. The composition of these mock communities are known,  
266 which allows validation of the sequencing accuracy. Amplicon sequencing for La Lopé and Rabai were  
267 conducted separately.

268 We demultiplexed the sequencing reads using USEARCH v10.0.240 (Edgar, 2010) and followed  
269 the pipeline of DADA2 (v1.8.0) (Callahan et al., 2016) to determine the bacterial community  
270 composition. DADA2 estimates sequencing errors and infers the exact sequence variants (i.e., amplicon  
271 sequence variants, or ASVs), which are analog to the conventional operational taxonomic unit (OTU). We  
272 summarized the frequency of each ASV in every water sample, and blasted the ASVs to the Ribosomal  
273 Database Project (RDP) 16s-rRNA gene reference database (RDP trainset 16 and RDP species  
274 assignment 16) (Cole et al., 2014) for taxonomic assignment. We then agglomerated ASVs into higher  
275 taxonomic levels for further analysis.

276 Using the DADA2 outputs and the R package *phyloseq* (McMurdie & Holmes, 2013), we first  
277 calculated the alpha diversity of the bacteria community in each oviposition site indicated by the Shannon  
278 index (Shannon, 1948), using the raw read counts of all samples. We then compared the index across  
279 oviposition site groups, habitats, and between *Ae. aegypti* present and *Ae. aegypti* absent sites. The  
280 community compositions were summarized by non-metric multidimensional scaling (NMDS) with the  
281 Bray-Curtis distance matrix. Similar to PCA, NMDS analysis summarizes multivariate data (each  
282 bacterial taxa as one variable), but is more appropriate for bacterial composition data (Ramette, 2007).  
283 Before NMDS analysis, we first removed samples with fewer than 5000 reads to avoid low-quality  
284 samples, and we thinned each sample proportionally to the lowest read depth of all samples to remove the  
285 impact of uneven sequencing depth between samples. Bacterial communities may show different  
286 assembly patterns at different taxonomic levels (Goldford et al., 2018). Therefore, we calculated the

287 Shannon index and performed NMDS at four taxonomic levels: ASV, Species, Genus, and Family. To  
288 provide more information on the detailed compositions of the bacterial communities, we also  
289 demonstrated the major bacterial groups at the Family level. Lastly, we used R package *DESeq2* to  
290 identify families that are most differentiated between habitats (Love, Huber, & Anders, 2014).

291 To estimate the temporal stability of the bacterial communities, for five oviposition sites in each  
292 habitat, we collected water samples more than once. The average number of days between two  
293 consecutive collections ranges from 3 to 21, with an average of 8.4 days in La Lopé and 17 days in Rabai.  
294 All temporal samples were sequenced, but only the first-day samples were included in analyses described  
295 above. We performed a separate NMDS analysis to examine variation between temporal samples.

#### 296 *Characterizing oviposition sites: chemical volatiles in Rabai, Kenya*

297 Chemical volatiles released from an oviposition site could act as olfactory cues for mosquitoes  
298 during oviposition site selection (Afify & Galizia, 2015), yet the volatile profiles of natural oviposition  
299 sites have rarely been examined. We attempted to describe the volatile profile in oviposition sites in  
300 Rabai, Kenya (we did not collect chemical data in La Lopé due to financial constraints). In brief, we  
301 collected water samples from a subset of oviposition sites (Table 1) and extracted the volatiles into an  
302 absorbent with a steady airflow. The captured volatiles were examined by Gas Chromatography–Mass  
303 Spectrometry (GC-MS) at Yale West Campus Analytical Core. We then identified and quantified each  
304 compound using the GC-MS results. The technical details of volatile extraction and GC-MS were  
305 described in the Appendix. Due to the sparsity of many compounds in the final dataset, we did not  
306 perform statistical analysis across oviposition site types or habitats, but instead summarized the  
307 compound concentrations using a heatmap.

#### 308 *Field oviposition choice experiments*

309 We conducted field oviposition experiments in both La Lopé and Rabai. We placed artificial and  
310 natural containers at forest sites and village sites and left them for use by wild mosquitoes. Bamboo

311 segments were used for the natural containers since they are similar to tree holes in size and shape and  
312 have been commonly used by African researchers to collect forest mosquitoes (Kemp & Jupp, 1991). The  
313 artificial containers used in La Lopé included tires, plastic bottles, plastic bags, bricks, and metal cans  
314 (see the insets in Figure 7 for a representation of these experimental containers). These containers are  
315 frequently found in the villages. We paired five bamboo with the five artificial containers to form a group  
316 of ten containers. We then placed these groups in four forest locations and four peridomestic locations.  
317 All containers were set up empty and filled by rainwater naturally. We retrieved all containers after  
318 roughly two weeks, collected larvae and pupae from them, and reared all mosquitoes to adults to count  
319 the number of *Ae. aegypti*. Because of the low yield in these experimental containers, within each  
320 habitats, we combined mosquitoes from all bamboos or all artificial containers, respectively. This resulted  
321 in a single count of *Ae. aegypti* from each types of container in habitat. We used a chi-squared test to  
322 examine whether habitat influences the distribution of *Ae. aegypti* in the bamboo versus artificial  
323 containers.

324 In Rabai, we followed similar procedures but used plastic buckets and earthenware pots as the  
325 artificial containers. Each container group thus consisted of two artificial containers and two bamboo  
326 fragments. Another difference is that instead of placing the container group in peridomestic as in La Lopé,  
327 we left them in domestic habitats (indoor), after receiving verbal permission from homeowners. We set up  
328 ten container groups in the Kaya Bomu forest and ten in Bengo village (Figure 1B). Tap water was added  
329 to the containers on the first day, as rains were not frequent enough and could not reach indoor containers.  
330 The experiment lasted for 7-10 days. In the end, containers were flooded to hatch all eggs, and we reared  
331 larvae and pupae in the field. We then counted the number of *Ae. aegypti* present in the bamboo or either  
332 type of artificial container. Instead of combining mosquito counts as described above for La Lopé  
333 experiments, we kept data from the ten containers groups (i.e. ten replicates) within each habitat separate.  
334 Each of the ten container groups thus represents a replicate in the choice experiment. After removing  
335 groups that produced no *Ae. aegypti*, we applied a beta-binomial model to address the effect of habitat on

336 the distribution of eggs between bamboo and artificial containers. The beta-binomial model was  
337 implemented in the R package *glmmTMB* (Brooks et al., 2017).

338         Although we chose containers as similar as possible to natural oviposition sites in both habitats, it  
339 is critical to examine how the environmental conditions of these experimental containers reflect the  
340 natural conditions. Therefore, we collected water samples from them at the end of the experiments and  
341 applied the 16s-rRNA gene amplicon sequencing and downstream NMDS analysis to examine the  
342 bacterial community in these experimental containers.

#### 343 *Laboratory oviposition assays*

344         In an attempt to disentangle the effects of different environmental variables on oviposition choice,  
345 we performed laboratory oviposition assays in a common-garden setup. The goal was to examine whether  
346 forest and village *Ae. aegypti* have different oviposition preferences towards a subset of environmental  
347 variables that differed between forest and village oviposition sites.

348         We established a forest colony and a peridomestic colony from La Lopé using *Ae. aegypti*  
349 collected from natural breeding sites, supplemented with oviposition traps and human landing capture  
350 (approved by the National Research Ethics Committee of Gabon under the protocol 0031/2014/SG/CNE).  
351 In Rabai, we created six independent village colonies from the four villages (four domestic colonies and  
352 two peridomestic colonies) and four forest colonies from the the Kaya Bomu forest. We blood-fed the  
353 mosquitoes in the field and brought the eggs back (i.e., the second generation) to our lab at Yale  
354 University and the McBride lab at Princeton University. The detailed information of the mosquito  
355 colonies and the protocol for rearing these colonies are in the Appendix. The two peridomestic colonies  
356 correspond to K63 and K65 in Rose et al. (2020) and the Rabai forest colonies correspond to K66 and  
357 K67. All laboratory oviposition assays were performed in the insectary at Yale University. We used the  
358 fourth to the sixth generation of mosquitoes in these assays. For simplicity, we will refer to the  
359 peridomestic colony in La Lopé and the domestic colonies in Rabai as village colonies.



360 In the first series of assays, we used two-choice tests. In each cage, five gravid females were  
361 allowed to choose from two oviposition cups with different conditions (see Appendix). Using this assay,  
362 we compared the oviposition preference of forest versus village colonies from La Lopé and Rabai towards  
363 several environmental variables.

364 We first tested a pair of Rabai forest and domestic colony (K66 vs. Kwa Bendegwa village) for  
365 their preference for water samples directly collected from forest and domestic oviposition sites in Rabai.  
366 The rest of the oviposition assays focused on specific environmental variables. We determined the target  
367 variables from the list of variables that showed a significant difference between forest and village  
368 oviposition sites in the field. The decision was also constrained by space, resources, and our experimental  
369 setup. For example, we were unable to test variables related to container size and height as well as  
370 ambient temperature and humidity, as they require much larger space than the capacity of our insectary.  
371 As a result, we tested pH, shading, larval density, and a combined effect of pH, conductivity, and shading  
372 in the K66 versus Kwa Bendegwa colony pair. Additionally, we conducted oviposition assays examining  
373 bacterial community composition in all La Lopé and Rabai colonies (Table S2 in the Appendix).

374 Conditions we examined in the assays replicated the median conditions of forest and village  
375 oviposition in nature (details of each assays are described in the Appendix). Specifically, in the  
376 experiments testing the preference for bacterial compositions, we create forest and village type of  
377 bacterial community by inoculating water samples collected from natural forest and village oviposition  
378 sites in nutritionally rich Lysogeny broth (LB). After growing the two bacterial cultures overnight, they  
379 were diluted to the same cell density and used as the two choices in the behavioral assays. Although the  
380 bacterial communities in these LB cultures likely vary from the actual bacterial communities in natural  
381 oviposition sites, they should still contain some representative bacterial taxa from each habitat.

382 We counted the number of eggs in oviposition cups at the end of each assay. Cages with fewer  
383 than ten eggs in total were removed from further analysis. We first calculated the oviposition activity  
384 index (OAI) (Kramer & Mulla, 1979) for each cage:

385 
$$OAI = \frac{N_1 - N_2}{N_1 + N_2}$$

386 where  $N_1$  and  $N_2$  are the number of eggs deposited in the two cups, respectively.  $OAI$  ranges from -1 to 1,  
387 which represents a complete preference for the second choice to a complete preference for the first  
388 choice. We performed beta-binomial models in the R package *glmmTMB* (Brooks et al., 2017) to examine  
389 whether colonies differ in their oviposition preference, using the two egg counts in each cage as the  
390 dependent variable (Rose et al., 2020). We added the batch/trial IDs as random effects if the experiments  
391 testing a condition spanned more than one trial. The statistical significance of colony or habitat effects  
392 were determined by comparing the full model with a null model that excludes colony or habitat  
393 information (Table S9). We then extracted mean  $OAI$  with a 95% confidence interval from the model  
394 using the R package *emmeans* (Lenth, Singmann, & Love, 2018; Rose et al., 2020).

395 In addition to the above two-choice assays, in the last series of laboratory assays, we tested the  
396 oviposition preference of all mosquito colonies to five bacterial densities. This is inspired by the large  
397 variation in bacterial density among field oviposition sites (more than two orders of magnitude) and that  
398 previous laboratory experiments with *Ae. aegypti* found density-dependent ovipositional responses to  
399 bacteria (Ponnusamy et al., 2015; Ponnusamy, Wesson, Arellano, Schal, & Apperson, 2010). We used a  
400 similar experimental design as the two-choice assays described above but provided each cage of gravid  
401 female mosquitoes five cups instead of two. The cups contained bacterial cultures at densities ranging  
402 from zero to nearly the maximal bacterial density in field oviposition sites. The bacterial culture was  
403 generated from an even mixture of forest and domestic water samples (Table S2 in the Appendix). We  
404 counted the numbers of eggs laid in the five cups and fitted a negative-binomial model using the R  
405 package *lme4* (Bates, Mächler, Bolker, & Walker, 2014) to detect significant differences between  
406 colonies and between the habitat type of the colonies. A full model with an interactive term of  
407 colony/habitat with bacterial densities was compared to a null model excluding this interactive term  
408 (Table S9). Because the number of eggs in the five cups from the same cage were not independent from

409 each other, we added the ID of cages as a random effect to control for this data structure. Lastly, we used  
410 the *emmeans* package to estimate the expected number of eggs in each bacterial density with 95%  
411 confidence intervals.

412

## 413 **Results**

### 414 *Characterizing oviposition sites: physical characteristics*

415 PCA analysis summarizing the 11 physical variables in La Lopé showed that the four oviposition  
416 site groups (two habitats  $\times$  *Ae. aegypti* present/absent) overlap extensively in the space described by the  
417 first two principal components, which together account for 38% of the total variance (Figure 2a).  
418 However, forest and peridomestic village sites appeared to differ slightly. In support of that, MRPP tests  
419 found a significant multivariate difference among the four groups ( $p = 0.019$ ) and between habitats when  
420 including both *Ae. aegypti* present and absent sites ( $p = 0.001$ ). Sites with *Ae. aegypti* did not differ  
421 significantly between habitats ( $p = 0.316$ ), possibly due to the small sample size (only five samples in the  
422 forest *Ae. aegypti* present category). Sites with and without *Ae. aegypti* did not differ significantly (all  
423 sites regardless of habitats:  $p = 0.311$ , only forest sites:  $p = 1$ , only peridomestic sites:  $p = 1$ ).

424 Examining the rotations of the original physical variables onto the first two principal component  
425 axes suggested two main groups of variables. The first one includes ambient temperature and humidity,  
426 shading (i.e., canopy coverage), container opening height, and water pH, which axis roughly corresponds  
427 to differentiation between forest and peridomestic oviposition sites. For these variables, we found a  
428 significant difference between habitats and between the four oviposition site groups (Figure S2, Table S3  
429 and S4). They also ranks highly in their variable importance measures (Figure S4a). These observations  
430 support the idea that variables in this group differentiate habitats. The second group mainly represents  
431 container size and water volume, with the latter differing significantly between forest and peridomestic  
432 oviposition sites (Table S3). *Ae. aegypti* present and absent sites have similar conditions for all variables

433 except the height of the container opening (Figure S2, Table S3 and S4). Container height is the main  
434 factor differentiating *Ae. aegypti* present vs. absent sites, especially within the peridomestic sites (Figure  
435 S3a).

436 In Rabai, similarly as in La Lopé, forest and peridomestic sites was modestly but significantly  
437 different in their physical characteristics (Figure 2b, PCA summarizing 16 physical variables). In addition  
438 to these two habitat types, we also measured indoor ‘domestic’ sites. The PCA results suggest a strong  
439 differentiation between forest and domestic oviposition sites (Figure 2b). Sites with and without *Ae.*  
440 *aegypti* in the forest did not show much difference. Consistent with PCA, MRPP found significant  
441 multivariate differences in most comparisons, except between forest sites with *Ae. aegypti* present vs.  
442 absent ( $p = 0.157$ ) and between domestic vs. peridomestic sites ( $p = 0.192$ ).

443 Forest and domestic oviposition sites were separated primarily along the first PC, which is  
444 explained by container size (e.g., diameter, circumference, etc.), water volume, and water pH (Figure 2b).  
445 Single variable comparisons confirmed that these variables are indeed different between forest and  
446 domestic/peridomestic oviposition sites (Figure S4, Table S5 and S6). On the other hand, comparisons of  
447 forest *Ae. aegypti* present vs. absent sites as well as between domestic and peridomestic sites found very  
448 few significant differences (Table S5 and S6). Canopy coverage, a measure of shading, also showed a  
449 strong difference across oviposition site groups and between habitats (Figure S4, Table S5 and S6). We  
450 expected this difference as domestic oviposition sites are always under roof, and peridomestic containers  
451 are mostly exposed, while forest tree holes are partially shaded by the canopy. Lastly, variables with  
452 significant differences between oviposition site groups or between habitats also generally have high ranks  
453 in the output of the Random Forests analysis of the corresponding comparisons (Figure S3b).

#### 454 *Characterizing oviposition sites: competition and predation*

455 The density of *Ae. aegypti* was similar between forest and peridomestic oviposition sites in La  
456 Lopé (Figure 3a, Table S4). Many oviposition sites in both habitats produced only one *Ae. aegypti* (Figure

457 S5a). Although peridomestic sites contained significantly more *Ae. aegypti* than forest sites (Figure S5a),  
458 they also had larger volumes (Figure S2f). Mosquitoes other than *Ae. aegypti* were recorded only in the  
459 La Lopé forest. Oviposition sites with and without *Ae. aegypti* in the forest did not show a significant  
460 difference in the total number or density of all mosquitoes (Figure S5b and S5c, Table S4). Analysis of  
461 predation found that the presence of predatory *Toxorhynchites* larvae did not differ among oviposition site  
462 groups, between habitats, or between *Ae. aegypti* present and absent sites ( $p > 0.05$  in all chi-squared  
463 tests).

464 In Rabai, *Ae. aegypti* density was significantly lower in domestic oviposition sites (Figure 3b,  
465 Table S6) in comparison with the other two habitats. The density difference between forest and domestic  
466 containers was mainly driven by the difference in water volume (Figure S4e). In contrast, the difference  
467 between peridomestic and domestic sites are due to the higher number of mosquitoes found in  
468 peridomestic sites (Figure S6a). When including other mosquito species, comparisons of mosquito  
469 numbers and densities between oviposition sites groups reached the same conclusion (Figure S6b and  
470 S6c, Table S5 and S6).

#### 471 *Characterizing oviposition sites: microbial density*

472 Microbial densities do not show significant differences between oviposition site groups, habitats,  
473 or *Ae. aegypti* present and absent sites in La Lopé (Figure 4a, Table S3 and S4). In Rabai, we found  
474 significantly lower microbial density in domestic oviposition sites than forest or peridomestic oviposition  
475 sites (Figure 4b, Table S5 and S6). Microbial densities were similar in forest and peridomestic oviposition  
476 sites. Lastly, *Ae. aegypti* present and absent sites have comparable levels of microbial density (Figure 4b,  
477 Table S5 and S6).

#### 478 *Characterizing oviposition sites: bacterial community composition*

479 The median depth of the amplicon sequencing was 17,420 reads per La Lopé samples and 56,478  
480 reads per Rabai samples. Negative controls yielded 0 - 976 reads (median: 33) and 0 - 11 ASVs (median:

481 4) per sample, which suggested minimal contamination from the sampling and library preparation  
482 procedures. We also reconstructed the mock communities relatively well using the sequencing results: we  
483 found 18-23 ASVs from mock communities containing 20 bacterial taxa and nine ASVs from another two  
484 mock communities that contain eight bacterial colonies (see the Appendix for more information on the  
485 mock communities).

486 In La Lopé, alpha diversity of the bacterial communities varies considerably. The Shannon index  
487 differs significantly across the four oviposition site groups at the Species and Genus level (Table S3). The  
488 pairwise comparison did not find any significant difference between any pairs of oviposition site groups  
489 at any taxonomic level (Table S4). Still, visually the peridomestic groups have higher Shannon indexes  
490 (Figure S7). This observation was reflected in the comparisons between habitats regardless of *Ae. aegypti*  
491 presence, as it suggested a significantly higher alpha diversity in peridomestic oviposition sites at the  
492 species, genus, and family level (Table S3). *Ae. aegypti* present and absent sites have similar alpha  
493 diversity at all taxonomic levels (Table S3). In Rabai samples, we did not find significant differences in  
494 the Shannon index across oviposition site groups or between habitats (Figure S8, Table S5 and S6). *Ae.*  
495 *aegypti* present sites have lower diversity than *Ae. aegypti* absent sites, but only when we included  
496 oviposition sites from all habitats (Table S5).

497 NMDS analysis suggested that forest and village (including peridomestic and domestic)  
498 oviposition sites had a very different bacterial community in both La Lopé and Rabai at the ASV level.  
499 Peridomestic sites in Rabai clustered with domestic sites (Figure 5). The forest-village divergence was  
500 less evident at higher taxonomic levels for the La Lopé oviposition sites, especially at the Family level  
501 (Figure S9). Rabai samples, on the other hand, retained the substantial difference between forest and  
502 village oviposition sites at all four taxonomic levels (Figure S10). In all NMDS analysis, oviposition sites  
503 present and absent with *Ae. aegypti* within each habitat always overlap extensively, which suggested that  
504 they likely have similar bacterial community composition (Figure 5, S9, and S10).

505           When examining the most abundant bacterial families across different oviposition site groups, we  
506 observed considerable variation among samples (Figure S11). Most oviposition sites contained  
507 representatives of multiple families with no clear dominance. Among the top ten families in La Lopé  
508 samples, *Microbacteriaceae*, *Flavobacteriaceae*, and *Burkholderiaceae* showed higher abundance in  
509 forest oviposition sites, while *Oxalobacteraceae* and *Sphingobacteriaceae* are more abundant in  
510 peridomestic sites (Figure S11a, Table S7). In Rabai oviposition sites, *Moraxellaceae* has an apparent  
511 dominance in domestic oviposition sites, but its abundance is not significantly different between habitats.  
512 *DESeq2* found a significantly higher abundance of *Enterobacteriaceae*, *Xanthomonadaceae*,  
513 *Pseudomonadaceae*, and *Planococcaceae* in forest oviposition sites than domestic and peridomestic sites  
514 (Figure S11b, Table S8). A full list of bacterial families that showed differential abundance between  
515 habitats are in Table S7 and S8 in the Appendix.

516           Lastly, NMDS analysis at the ASV level found that temporal samples collected from the same  
517 oviposition site do vary in their bacterial community, but remain in the same cluster defined by habitats  
518 (Figure S12). That is, temporal samples from forest cluster with the rest of forest oviposition sites instead  
519 of sites from other habitats and vice versa. This result suggests that the strong divergence in bacterial  
520 communities between habitat are likely temporally stable.

#### 521 *Characterizing oviposition sites: chemical volatiles in Rabai, Kenya*

522           The volatile profiles of a subset of oviposition sites in Rabai were summarized in Figure 6. There  
523 was substantial variation in the chemical composition of samples, both within habitats and across habitats.  
524 GC-MS analysis identified a total of 48 chemical compounds. About half of them were shared across  
525 different habitats, but we found a few chemicals that were unique to either forest or domestic habitat.

#### 526 *Field oviposition choice experiments*

527           Experimental containers in the forest and the village produced in total 61 and 95 *Ae. aegypti*,  
528 respectively, in La Lopé. The majority of the *Ae. aegypti* were from bamboo in the forest and artificial

529 containers in the village (Figure 7a). This habitat-associated bias in *Ae. aegypti* production between the  
530 two types of containers was statistically significant (chi-square test:  $\chi^2 = 52.1$ ,  $df = 1$ ,  $p < 0.001$ ). In  
531 Rabai, we collected all but one *Ae. aegypti* from artificial containers in the village (Figure 7b). *Ae. aegypti*  
532 were also more abundant in artificial containers than in bamboo in the forest, which is the opposite of the  
533 finding in La Lopé. However, the beta-binomial model still found a significant effect of habitat (Figure  
534 7c, AIC of full model: 54.3, AIC of null model: 48.9, model comparison:  $\chi^2 = 7.38$ ,  $df = 1$ ,  $p = 0.007$ ).

535         When examining the bacterial community composition of these experimental containers, NMDS  
536 analysis found that regardless of the container type and the habitats where they were located, all  
537 experimental containers clustered with natural village (peridomestic and domestic) oviposition sites  
538 (Figure S13).

#### 539 *Laboratory oviposition assays*

540         The results of the laboratory oviposition assays are shown in Figure 8 and Figure S14. Based on  
541 the OAI confidence interval estimated by the beta-binomial models, we found three significant  
542 preferences among all experiments: Rabai Kwa Bendegwa village colony preferred forest water samples  
543 over village water samples, and forest mosquito larval density over village larval density; La Lopé forest  
544 colony preferred the bacterial culture started with peridomestic water samples over that started with forest  
545 water samples. However, there is significant within-colony variation in most experiments. When  
546 comparing between colonies or between the habitat types of the colonies, the beta-binomial models did  
547 not find any significant difference in any assays (Table S9). Lastly, we applied a negative-binomial model  
548 to analyze the results of oviposition assays testing bacterial densities (Figure 9). Neither colonies nor the  
549 habitats of the colonies have a significant effect on the mosquito's preference for the five bacterial  
550 densities (Table S9). La Lopé village colonies showed a weak preference for lower bacterial densities, but  
551 the trend was not statistically significant (ANOVA for the effect of oviposition choices:  $F = 1.56$ ,  $df = 4$ ,  
552  $p = 0.200$ ).



## 553 Discussion

554 In this study, we found that oviposition sites in different habitats tend to have different physical  
555 properties and bacterial community composition, in both La Lopé and Gabon (Figure 2 and 5). Outdoor  
556 peridomestic sites have moderately different physical characteristics from forest sites in both locations,  
557 while the forest-domestic comparison unique to Rabai reveals a even stronger differentiation (Figure 2).  
558 The bacterial composition in forest oviposition sites is consistently very distinct from the other two  
559 village habitats (Figure 5). Unique to the Rabai system, we also found significantly lower larval and  
560 bacterial densities in domestic oviposition sites (Figure 3b and 4b), as well as some differences in the  
561 chemical profiles between forest and domestic oviposition sites (Figure 6). These results support our  
562 hypothesis that *Ae. aegypti* living in their ancestral forest habitats and invaded anthropogenic habitats are  
563 using oviposition sites with different average properties.

564 Within each habitat, oviposition sites with *Ae. aegypti* present or absent at the time of collection  
565 share similar environmental conditions. We found some significant differences between *Ae. aegypti*  
566 present and absent sites, but only when we combined sites across all habitats. These results can be  
567 partially explained by the uneven distribution of *Ae. aegypti* present vs. absent sites across habitats. For  
568 example, in Rabai, all but one *Ae. aegypti* absent sites were in the forest, so the comparison between all  
569 *Ae. aegypti* absent and present sites were largely confounded by the contrast between forest and domestic  
570 sites. Another caveat for this comparison between *Ae. aegypti* present vs. absent sites lies in the difficulty  
571 of confirming that the absence of *Ae. aegypti* in any site was due to active avoidance. However, if *Ae.*  
572 *aegypti* actively choose only a subset of oviposition sites with specific environments, we would expect to  
573 see a tighter clustering of sites with *Ae. aegypti* present than absent, which is not the case in our data  
574 (Figure 2 and 5). Therefore, it is likely that wild *Ae. aegypti* do not have a strong preference when  
575 choosing oviposition sites within their native habitats and could use most available sites.

576 Many environmental characteristics of natural oviposition sites, such as the bacterial  
577 communities, predation risk, and competition are likely dynamic and vary depending on weather, season,

578 and stochastic events (e.g., leaf litter falling into a site). In our data, we did find variation in bacterial  
579 communities in temporal samples from a few oviposition sites. However, these temporal differences did  
580 not exceed the scale of within-habitat variation (Figure S12), which suggested that the main difference we  
581 found between forest and peridomestic/domestic oviposition sites were likely stable over time. We expect  
582 a similar or even higher level of temporal stability in most physical characteristics of oviposition sites as  
583 they are more intrinsic to the containers (e.g., container size) or their locations (e.g., shading).  
584 Unfortunately, all our sampling was conducted during the rainy season, and the largest interval between  
585 two temporal samples was 21 days, which is not enough to evaluate seasonal variabilities. In dry seasons,  
586 it is generally easier to collect *Ae. aegypti* by ovitraps in the field (personal observations), which may  
587 suggest that either the mosquitoes are less selective when there are fewer natural oviposition sites  
588 available, or the mosquitoes have an altered preference in dry seasons. Recently studies suggested that  
589 seasonality may play an important role in driving the domestication of *Ae. aegypti* (Powell & Tabachnick,  
590 2013; Rose et al., 2020). Therefore, future studies are needed to examine the seasonal change of  
591 oviposition site conditions, in order to provide a full picture of the ecological backdrop for mosquito  
592 oviposition.

593         Only a few studies so far has characterized the environmental conditions of *Ae. aegypti* natural  
594 oviposition sites. Dickson et al. (2017) described the bacterail community composition in field  
595 oviposition sites in La Lopé, Gabon and found a strong differentiation between habitats, which is echoed  
596 in our study. Yet that study did not examined other environmental conditions such as the physical  
597 variables. Another study compared several environmental conditions between tree holes and tires in  
598 Hattiesburg, MS, USA, and found consistent differences between them (Yee et al., 2012). However, *Ae.*  
599 *aegypti* were not present in most containers in that study. Therefore, the environmental data reported in  
600 the current study added useful information to our understanding of the ecology of *Ae. aegypti* oviposition.  
601 Admittedly, our data may not cover the full temporal variations in the field, and the complex field  
602 conditions limited the accuracy of some measures. For instance, accurate volume and surface area

603 estimates were challenging for some irregularly shaped sites. However, we hope this initial quantification  
604 of natural oviposition sites could provide useful information for generating hypotheses regarding the  
605 evolution of *Ae. aegypti* oviposition.

606 One hypothesis we wanted to test in this study is that environmental differentiation between  
607 forest and village (peridomestic and domestic) oviposition sites leads to divergent oviposition preference  
608 in the mosquitoes. The results of the field oviposition assay did suggest some behavioral differences  
609 between forest and village *Ae. aegypti* in both La Lopé and Rabai (Figure 7). However, these results need  
610 to be interpreted with caution. Because we counted *Ae. aegypti* after they developed into adults instead of  
611 at the egg stage, the number in each experimental container could be affected by factors other than  
612 oviposition preference, such as egg hatching rate and larval survival etc. In addition, although bamboo  
613 segments are similar to tree holes in size and shape, they possessed bacterial communities that resembled  
614 the artificial containers (Figure S13). Therefore, results of the field oviposition experiments might reflect  
615 a behavioral difference, if it truly exists, that does not fully correspond to the between-habitat difference  
616 of natural oviposition sites. It is unclear what are the exact mechanisms of this differential production of  
617 *Ae. aegypti* from bamboo and artificial containers in different habitats, which could be of interest for  
618 future studies. An interesting possibility is that choice of bamboo versus artificial containers was affected  
619 by their apparency in each habitat (Harrington et al., 2008; Strauss, Cacho, Schwartz, Schwartz, & Burns,  
620 2015). For example, domestic habitats may present less visual obstacles and make the artificial container  
621 stand out more. This potential visual effect may be of interest for future studies.

622 Nevertheless, the results of field experiments provided strong evidence that *Ae. aegypti* in the  
623 forest habitat readily accept artificial containers. They might even prefer these containers, as we collected  
624 more *Ae. aegypti* from these artificial containers placed in the forest (22 in La Lopé and 645 in Rabai)  
625 than from tree holes or rock pools (9 in La Lopé and 156 in Rabai). These results imply that *Ae. aegypti*  
626 may be predisposed to use artificial containers for oviposition. Oviposition choices have been suggested  
627 to have a strong impact on the movement of *Ae. aegypti* (Reiter, 2007). Previous studies also proposed

628 that females turning to human stored water for oviposition during dry seasons may be a key driver for the  
629 human specialization of *Ae. aegypti* inside Africa (Brown et al., 2014; Powell et al., 2018; Powell &  
630 Tabachnick, 2013; Rose et al., 2020). As suggested by our field experiment results, this crucial  
631 ovipositional transition might happen relatively easily and frequently. Consistent with this hypothesis, a  
632 population genetic study using *Ae. aegypti* collected in La Lopé and Rabai found very little evidence of  
633 genetic differentiation between habitats, which indicates that mosquitoes could move between habitats  
634 freely (Xia et al. submitted). On the other hand, this extensive connectivity in the local scale between  
635 habitats may hinder any phenotypic divergence from evolving, consistent with the lack of oviposition  
636 differences in the lab (Figure 8). In a more regional scale where gene flow is less frequent, there may be  
637 differences between mosquitoes from different habitats, as found for host odor preference by Rose et al.  
638 (2020).

639 In line with this “predisposal” hypothesis, it is possible that *Ae. aegypti* from La Lopé and Rabai  
640 are not very selective in their oviposition choices in general. We found considerable OAI variation within  
641 each colony despite the well-controlled rearing and experimental procedures. Only a few trials found any  
642 significant preference for any choices. Yet in these assays, the direction of preference was opposite our  
643 prediction (e.g., one domestic colony from Rabai showed a preference for forest water samples over  
644 domestic water samples; Figure 8a). Lastly, we did not find a significant difference between forest and  
645 village mosquito colonies in any assays (Figure 8 and 9). However, these results of the laboratory  
646 oviposition assays need to be interpreted with caution. For example, we cannot rule out the possibility  
647 that that we simply lacked the power to detect the preference. Yet, our sample sizes are comparable to  
648 many previous studies that used a similar experimental design and found significant oviposition  
649 preference (Afify, Horlacher, Roller, & Galizia, 2014; Allan & Kline, 1995; Ganesan, Mendki,  
650 Suryanarayana, Prakash, & Malhotra, 2006; Melo et al., 2020). It is also possible that the choices we  
651 tested are not of a magnitude detectable by female *Ae. aegypti*. However, these choices were informed by  
652 the characteristics of natural oviposition sites, and therefore should be ecologically relevant for the

653 mosquitoes. We are currently testing some more extreme conditions (e.g., complete shading vs. complete  
654 exposure) using the same groups of La Lopé and Rabai colonies, which will be summarized in a future  
655 report.

656 Another strong possibility is that mosquitoes use multiple cues simultaneously in choosing  
657 oviposition sites, as previous studies found a broad spectrum of factors influencing *Ae. aegypti*  
658 oviposition (Afify & Galizia, 2015; Arbaoui & Chua, 2014; Day, 2016; Harrington et al., 2008; Leahy et  
659 al., 1978; Wong, Stoddard, Astete, Morrison, & Scott, 2011). Because most of our choice assays focused  
660 on a single variable, it is premature to reach a definitive conclusion of no behavioral difference. Future  
661 experiments testing more combinations of environmental factors are needed to gain a deeper  
662 understanding of the potential synergistic effects of the environments on driving oviposition evolution in  
663 *Ae. aegypti formosus*.

664 In summary, this study confirmed a strong environmental difference between forest and village  
665 oviposition sites in both Gabon (La Lopé) and Kenya (Rabai). Our ecological divergence hypothesis  
666 suggested that *Ae. aegypti* in different habitats may evolve divergent oviposition preferences  
667 corresponding to these environmental differences. However, direct behavioral data from this study was  
668 insufficient to support this hypothesis. The similar environmental conditions between *Ae. aegypti* present  
669 vs. absent sites in the field also suggested no strong selectivity within habitats. Considering all the  
670 findings, it is possible that *Ae. aegypti* in La Lopé and Rabai behave as generalists when choosing  
671 oviposition sites. If this is the case, the initial transition between habitats may not require significant  
672 changes in oviposition behavior. After occupying different habitats, mosquitoes may start to evolve some  
673 minor behavioral differences, but likely not strong enough to discriminate against oviposition sites from  
674 the other habitats and impede gene flow at this small geographic scale. This speculation is consistent with  
675 the documentation of multiple independent invasions of domestic habitats in Africa in recent years  
676 (Kotsakiozi, Evans, et al., 2018; Powell & Tabachnick, 2013), including the latest cases of La Lopé and  
677 Rabai (Xia et al., submitted). Being an ovipositional generalist benefits *Ae. aegypti* as they are capable of

678 utilizing a large variety of containers (Petersen, 1977; Simard, Nchoutpouen, Toto, & Fontenille, 2005),  
679 and thus quickly respond to environmental changes such as the drying of tree holes as well as within-  
680 container competition. In the forest, most oviposition sites we surveyed contained multiple species. A  
681 previous study in Kenya found a positive association between *Ae. aegypti* and a few other *Aedes* species  
682 in tree holes (Lounibos, 1981), which could lead to resource competition. It is possible that this  
683 competition and possibly predation, in combination with the flexibility of *Ae. aegypti* oviposition choices,  
684 drove the mosquito to exploit artificial containers. This raises the question of why most other mosquito  
685 species do not exploit domestic habitats. What makes *Ae. aegypti* so special?

686 *Ae. aegypti* are known to spread risks during oviposition by a conservative bet-hedging strategy  
687 (Starrfelt & Kokko, 2012), namely ‘skip oviposition’: A gravid female distributes her eggs across  
688 multiple containers to prevent losing all eggs due to the destruction of any single oviposition site (Colton,  
689 Chadee, & Severson, 2003; Swan, Lounibos, & Nishimura, 2018). If *Ae. aegypti* can accept a large  
690 variety of oviposition choices, they could further spread the risk. It would be interesting to examine  
691 whether the large inter-individual variation we observed in oviposition choice assays are heritable and  
692 consistent across the lifetime of individual mosquitoes.

693 This study examined *Ae. aegypti* in forests and rural villages in Africa, where the domestication  
694 of this epidemiologically important species likely first occurred (Powell et al., 2018; Powell &  
695 Tabachnick, 2013). Outside of Africa, *Ae. aegypti* are closely associated with human communities and  
696 use almost exclusively artificial containers for oviposition, except in the Caribbean and Argentina  
697 (Chadee et al., 1998; Mangudo et al., 2015). Studies from the 1970s and continuing through 2014 found a  
698 human-specialized strain of *Ae. aegypti* reintroduced to Rabai from America or Asia (Brown et al., 2011;  
699 McBride et al., 2013; Tabachnick et al., 1979; Tabachnick & Powell, 1978; Trpis & Hausermann, 1978),  
700 which have likely gone extinct before our study in Rabai in 2017 (Xia et al. submitted). Comparing this  
701 re-introduced strain with the local sylvatic *Ae. aegypti* back then revealed significant behavioral  
702 differences, including their oviposition preference (Leahy et al., 1978; Petersen, 1977; Trpis &

703 Hausermann, 1975). These pieces of evidence suggested that *Ae. aegypti* outside of Africa have  
704 behaviorally specialized to the domestic oviposition sites. When did the ovipositional adaptation happen,  
705 if *Ae. aegypti* remain largely generalists during the initial invasion inside Africa? A few recent studies  
706 suggested that human specialization may happen somewhere in West Africa, such as Sahel or Angola  
707 (Crawford et al., 2017; Powell et al., 2018; Rose et al., 2020). This specialization may not always  
708 accompany the use of domestic habitats inside Africa, but may play a key role for the spread of this  
709 species to the rest of the world. More studies examining the initial domestication process inside Africa and  
710 the later human specialization are necessary for providing a more comprehensive understanding of the  
711 evolutionary history of *Ae. aegypti*.

712

### 713 **Literature cited**

- 714 Afify, A., & Galizia, C. G. (2015). Chemosensory Cues for Mosquito Oviposition Site Selection. *Journal*  
715 *of Medical Entomology*, 52(2), 120-130. doi:10.1093/jme/tju024
- 716 Afify, A., Horlacher, B., Roller, J., & Galizia, C. G. (2014). Different repellents for *Aedes aegypti* against  
717 blood-feeding and oviposition. *PLoS One*, 9(7).
- 718 Albeny-Simoes, D., Murrell, E. G., Elliot, S. L., Andrade, M. R., Lima, E., Juliano, S. A., & Vilela, E. F.  
719 (2014). Attracted to the enemy: *Aedes aegypti* prefers oviposition sites with predator-killed  
720 conspecifics. *Oecologia*, 175(2), 481-492. doi:10.1007/s00442-014-2910-1
- 721 Allan, S. A., & Kline, D. L. (1995). Evaluation of organic infusions and synthetic compounds mediating  
722 oviposition in *Aedes albopictus* and *Aedes aegypti* (Diptera: Culicidae). *Journal of Chemical*  
723 *Ecology*, 21(11), 1847-1860.
- 724 Arbaoui, A., & Chua, T. (2014). Bacteria as a source of oviposition attractant for *Aedes aegypti*  
725 mosquitoes. *Trop Biomed*, 31(1), 134-142.

- 726 Barrera, R., Amador, M., & Clark, G. G. (2006). Ecological factors influencing *Aedes aegypti* (Diptera:  
727 Culicidae) productivity in artificial containers in Salinas, Puerto Rico. *Journal of Medical*  
728 *Entomology*, 43(3), 484-492.
- 729 Bates, D., Mächler, M., Bolker, B., & Walker, S. (2014). Fitting linear mixed-effects models using lme4.  
730 *arXiv preprint arXiv:1406.5823*.
- 731 Bentley, M. D., & Day, J. F. (1989). Chemical ecology and behavioral aspects of mosquito oviposition.  
732 *Annual Review of Entomology*, 34(1), 401-421.
- 733 Bond, H. A., & Fay, R. W. (1969). Factors influencing *Aedes aegypti* occurrence in containers. *Mosq*  
734 *News*, 29(1), 113-116.
- 735 Brooks, M. E., Kristensen, K., van Benthem, K. J., Magnusson, A., Berg, C. W., Nielsen, A., . . . Bolker,  
736 B. M. (2017). glmmTMB balances speed and flexibility among packages for zero-inflated  
737 generalized linear mixed modeling. *The R journal*, 9(2), 378-400.
- 738 Brown, J. E., Evans, B. R., Zheng, W., Obas, V., Barrera-Martinez, L., Egizi, A., . . . Powell, J. R. (2014).  
739 Human impacts have shaped historical and recent evolution in *Aedes aegypti*, the dengue and  
740 yellow fever mosquito. *Evolution*, 68(2), 514-525. doi:10.1111/evo.12281
- 741 Brown, J. E., McBride, C. S., Johnson, P., Ritchie, S., Paupy, C., Bossin, H., . . . Powell, J. R. (2011).  
742 Worldwide patterns of genetic differentiation imply multiple 'domestications' of *Aedes aegypti*, a  
743 major vector of human diseases. *Proc Biol Sci*, 278(1717), 2446-2454.  
744 doi:10.1098/rspb.2010.2469
- 745 Burkot, T., Handzel, T., Schmaedick, M., Tufa, J., Roberts, J., & Graves, P. (2007). Productivity of  
746 natural and artificial containers for *Aedes polynesiensis* and *Aedes aegypti* in four American  
747 Samoan villages. *Medical and Veterinary Entomology*, 21(1), 22-29.
- 748 Callahan, B. J., McMurdie, P. J., Rosen, M. J., Han, A. W., Johnson, A. J. A., & Holmes, S. P. (2016).  
749 DADA2: high-resolution sample inference from Illumina amplicon data. *Nature Methods*, 13(7),  
750 581.



- 751 Chadee, D. D., Ward, R. A., & Novak, R. J. (1998). Natural habitats of *Aedes aegypti* in the Caribbean--a  
752 review. *Journal of the American Mosquito Control Association*, *14*(1), 5-11.
- 753 Christophers, S. (1960). *Aedes aegypti* (L.) the yellow fever mosquito: its life history, bionomics and  
754 structure. *Rickard*.
- 755 Cole, J. R., Wang, Q., Fish, J. A., Chai, B., McGarrell, D. M., Sun, Y., . . . Tiedje, J. M. (2014).  
756 Ribosomal Database Project: data and tools for high throughput rRNA analysis. *Nucleic Acids*  
757 *Research*, *42*(D1), D633-D642.
- 758 Colton, Y., Chadee, D., & Severson, D. (2003). Natural skip oviposition of the mosquito *Aedes aegypti*  
759 indicated by codominant genetic markers. *Medical and Veterinary Entomology*, *17*(2), 195-204.
- 760 Crawford, J. E., Alves, J. M., Palmer, W. J., Day, J. P., Sylla, M., Ramasamy, R., . . . Jiggins, F. M.  
761 (2017). Population genomics reveals that an anthropophilic population of *Aedes aegypti*  
762 mosquitoes in West Africa recently gave rise to American and Asian populations of this major  
763 disease vector. *BMC Biology*, *15*(1), 16.
- 764 Day, J. F. (2016). Mosquito oviposition behavior and vector control. *Insects*, *7*(4), 65.
- 765 Dickson, L. B., Jiolle, D., Minard, G., Moltini-Conclois, I., Volant, S., Ghoulane, A., . . . Lambrechts, L.  
766 (2017). Carryover effects of larval exposure to different environmental bacteria drive adult trait  
767 variation in a mosquito vector. *Science Advances*, *3*(8), e1700585. doi:10.1126/sciadv.1700585
- 768 Edgar, R. C. (2010). Search and clustering orders of magnitude faster than BLAST. *Bioinformatics*,  
769 *26*(19), 2460-2461.
- 770 Fay, R., & Perry, A. (1965). Laboratory studies of ovipositional preferences of *Aedes aegypti*. *Mosquito*  
771 *News*, *25*(276-281), 281.
- 772 Ganesan, K., Mendki, M. J., Suryanarayana, M. V., Prakash, S., & Malhotra, R. C. (2006). Studies of  
773 *Aedes aegypti* (Diptera: Culicidae) ovipositional responses to newly identified semiochemicals  
774 from conspecific eggs. *Australian Journal of Entomology*, *45*(1), 75-80.

- 775 Gloria-Soria, A., Ayala, D., Bheecarry, A., Calderon-Arguedas, O., Chadee, D. D., Chiappero, M., . . .  
776 Kamal, H. A. (2016). Global genetic diversity of *Aedes aegypti*. *Molecular Ecology*, 25(21),  
777 5377-5395.
- 778 Goldford, J. E., Lu, N., Bajić, D., Estrela, S., Tikhonov, M., Sanchez-Gorostiaga, A., . . . Sanchez, A.  
779 (2018). Emergent simplicity in microbial community assembly. *Science*, 361(6401), 469-474.  
780 doi:10.1126/science.aat1168
- 781 Grant, P. R., & Grant, B. R. (2002). Adaptive radiation of Darwin's finches: Recent data help explain how  
782 this famous group of Galapagos birds evolved, although gaps in our understanding remain.  
783 *American Scientist*, 90(2), 130-139.
- 784 Grant, P. R., & Grant, B. R. (2011). *How and why species multiply: the radiation of Darwin's finches*:  
785 Princeton University Press.
- 786 Harrington, L. C., Ponlawat, A., Edman, J. D., Scott, T. W., & Vermeulen, F. (2008). Influence of  
787 container size, location, and time of day on oviposition patterns of the dengue vector, *Aedes*  
788 *aegypti*, in Thailand. *Vector Borne and Zoonotic Diseases*, 8(3), 415-423.  
789 doi:10.1089/vbz.2007.0203
- 790 Hatfield, T., & Schluter, D. (1999). Ecological speciation in sticklebacks: environment-dependent hybrid  
791 fitness. *Evolution*, 53(3), 866-873.
- 792 Hazard, E., Mayer, M., & Savage, K. (1967). Attraction and oviposition stimulation of gravid female  
793 mosquitoes by bacteria isolated from hay infusions. *Mosq. News*, 27, 133-136.
- 794 Hulme-Beaman, A., Dobney, K., Cucchi, T., & Searle, J. B. (2016). An Ecological and Evolutionary  
795 Framework for Commensalism in Anthropogenic Environments. *Trends in Ecology & Evolution*,  
796 31(8), 633-645. doi:<https://doi.org/10.1016/j.tree.2016.05.001>
- 797 Johnson, M. T. J., & Munshi-South, J. (2017). Evolution of life in urban environments. *Science*,  
798 358(6363), eaam8327. doi:10.1126/science.aam8327

- 799 Kemp, A., & Jupp, P. (1991). Potential for dengue in South Africa: Mosquito ecology with particular  
800 reference to *Aedes aegypti*. *Journal of the American Mosquito Control Association*, 7(4), 574-  
801 583.
- 802 Kotsakiozi, P., Evans, B. R., Gloria-Soria, A., Kamgang, B., Mayanja, M., Lutwama, J., . . . Badolo, A.  
803 (2018). Population structure of a vector of human diseases: *Aedes aegypti* in its ancestral range,  
804 Africa. *Ecology and Evolution*, 8(16), 7835-7848.
- 805 Kotsakiozi, P., Gloria-Soria, A., Schaffner, F., Robert, V., & Powell, J. R. (2018). *Aedes aegypti* in the  
806 Black Sea: recent introduction or ancient remnant? *Parasites & Vectors*, 11(1), 396.
- 807 Kozich, J. J., Westcott, S. L., Baxter, N. T., Highlander, S. K., & Schloss, P. D. (2013). Development of a  
808 dual-index sequencing strategy and curation pipeline for analyzing amplicon sequence data on the  
809 MiSeq Illumina sequencing platform. *Applied and Environmental Microbiology*, 79(17), 5112-  
810 5120.
- 811 Kramer, W. L., & Mulla, M. S. (1979). Oviposition attractants and repellents of mosquitoes: oviposition  
812 responses of *Culex* mosquitoes to organic infusions. *Environmental Entomology*, 8(6), 1111-  
813 1117.
- 814 Leahy, S. M., VandeHey, R., & Booth, K. (1978). Differential response to oviposition site by feral and  
815 domestic populations of *Aedes aegypti* (L.)(Diptera: Culicidae). *Bulletin of Entomological*  
816 *Research*, 68(03), 455-463.
- 817 Lenth, R., Singmann, H., & Love, J. (2018). Emmeans: Estimated marginal means, aka least-squares  
818 means. *R package version*, 1(1).
- 819 Li, M. I., Wong, P. S., Ng, L. C., & Tan, C. H. (2012). Oral susceptibility of Singapore *Aedes (Stegomyia)*  
820 *aegypti* (Linnaeus) to Zika virus. *PLoS Neglected Tropical Diseases*, 6(8), e1792.  
821 doi:10.1371/journal.pntd.0001792
- 822 Liaw, A., & Wiener, M. (2002). Classification and regression by randomForest. *R news*, 2(3), 18-22.
- 823 Lounibos, L. (1981). Habitat segregation among African treehole mosquitoes. *Ecological Entomology*,  
824 6(2), 129-154.

- 825 Love, M. I., Huber, W., & Anders, S. (2014). Moderated estimation of fold change and dispersion for  
826 RNA-seq data with DESeq2. *Genome biology*, 15(12), 550.
- 827 Madeira, N., Macharelli, C., & Carvalho, L. (2002). Variation of the oviposition preferences of *Aedes*  
828 *aegypti* in function of substratum and humidity. *Memorias do Instituto Oswaldo Cruz*, 97(3), 415-  
829 420.
- 830 Mangudo, C., Aparicio, J. P., & Gleiser, R. M. (2015). Tree holes as larval habitats for *Aedes aegypti* in  
831 urban, suburban and forest habitats in a dengue affected area. *Bulletin of Entomological*  
832 *Research*, 105(6), 679-684.
- 833 Marcondes, C. B., & Ximenes, M. d. F. F. d. (2016). Zika virus in Brazil and the danger of infestation by  
834 *Aedes* (*Stegomyia*) mosquitoes. *Revista da Sociedade Brasileira de Medicina Tropical*, 49(1), 4-  
835 10.
- 836 Matthews, B. J., Younger, M. A., & Vosshall, L. B. (2019). The ion channel ppk301 controls freshwater  
837 egg-laying in the mosquito *Aedes aegypti*. *eLife*, 8, e43963.
- 838 McBride, C. S., Baier, F., Omondi, A. B., Lutomiah, J., Spitzer, S., Sang, R., . . . Vosshall, L. B. (2013).  
839 *Genetic analysis of preference for human scent in evolutionarily divergent forms of the dengue*  
840 *fever mosquito, Aedes aegypti*. Paper presented at the Pathogens and Global Health.
- 841 McBride, C. S., Baier, F., Omondi, A. B., Spitzer, S. A., Lutomiah, J., Sang, R., . . . Vosshall, L. B.  
842 (2014). Evolution of mosquito preference for humans linked to an odorant receptor. *Nature*,  
843 515(7526), 222-227. doi:10.1038/nature13964
- 844 McMurdie, P. J., & Holmes, S. (2013). phyloseq: an R package for reproducible interactive analysis and  
845 graphics of microbiome census data. *PloS one*, 8(4).
- 846 Melo, N., Wolff, G. H., Costa-da-Silva, A. L., Arribas, R., Triana, M. F., Gugger, M., . . . Stensmyr, M.  
847 C. (2019). Geosmin attracts *Aedes aegypti* mosquitoes to oviposition sites. *BioRxiv*, 598698.
- 848 Melo, N., Wolff, G. H., Costa-da-Silva, A. L., Arribas, R., Triana, M. F., Gugger, M., . . . Stensmyr, M.  
849 C. (2020). Geosmin attracts *Aedes aegypti* mosquitoes to oviposition sites. *Current Biology*,  
850 30(1), 127-134. e125.

- 851 Mullen, L. M., Vignieri, S. N., Gore, J. A., & Hoekstra, H. E. (2009). Adaptive basis of geographic  
852 variation: genetic, phenotypic and environmental differences among beach mouse populations.  
853 *Proceedings of the Royal Society of London B: Biological Sciences*, 276(1674), 3809-3818.
- 854 Nosil, P. (2007). Divergent host plant adaptation and reproductive isolation between ecotypes of *Timema*  
855 *cristinae* walking sticks. *The American Naturalist*, 169(2), 151-162.
- 856 Nosil, P. (2012). *Ecological speciation*: Oxford University Press.
- 857 Nosil, P., & Crespi, B. (2004). Does gene flow constrain adaptive divergence or vice versa? A test using  
858 ecomorphology and sexual isolation in *Timema cristinae* walking-sticks. *Evolution*, 58(1), 102-  
859 112.
- 860 Otto, S. P. (2018). Adaptation, speciation and extinction in the Anthropocene. *Proceedings of the Royal*  
861 *Society B: Biological Sciences*, 285(1891), 20182047. doi:10.1098/rspb.2018.2047
- 862 Pamplona Lde, G., Alencar, C. H., Lima, J. W., & Heukelbach, J. (2009). Reduced oviposition of *Aedes*  
863 *aegypti* gravid females in domestic containers with predatory fish. *Tropical Medicine and*  
864 *International Health*, 14(11), 1347-1350. doi:10.1111/j.1365-3156.2009.02377.x
- 865 Paupy, C., Brengues, C., Kamgang, B., Hervé, J.-P., Fontenille, D., & Simard, F. (2014). Gene flow  
866 between domestic and sylvan populations of *Aedes aegypti* (Diptera: Culicidae) in North  
867 Cameroon. *Journal of Medical Entomology*, 45(3), 391-400.
- 868 Petersen, J. L. (1977). *Behavioral Differences in Two Subspecies of Aedes aegypti (L.) (Diptera:*  
869 *Culicidae) in East Africa*. University of Notre Dame,
- 870 Ponnusamy, L., Schal, C., Wesson, D. M., Arellano, C., & Apperson, C. S. (2015). Oviposition responses  
871 of *Aedes* mosquitoes to bacterial isolates from attractive bamboo infusions. *Parasit Vectors*, 8,  
872 486. doi:10.1186/s13071-015-1068-y
- 873 Ponnusamy, L., Wesson, D. M., Arellano, C., Schal, C., & Apperson, C. S. (2010). Species composition  
874 of bacterial communities influences attraction of mosquitoes to experimental plant infusions.  
875 *Microbial Ecology*, 59(1), 158-173.

- 876 Powell, J. R., Gloria-Soria, A., & Kotsakiozi, P. (2018). Recent history of *Aedes aegypti*: vector  
877 Genomics and Epidemiology records. *Bioscience*, 68(11), 854-860.
- 878 Powell, J. R., & Tabachnick, W. J. (2013). History of domestication and spread of *Aedes aegypti*-A  
879 Review. *Memorias do Instituto Oswaldo Cruz*, 108, 11-17.
- 880 Prado, G., Maciel, J., Leite, G., & Souza, M. (2017). Influence of shading and pedestrian traffic on the  
881 preference of *Aedes (Stegomyia) aegypti* (Diptera: Culicidae) for oviposition microenvironments.  
882 *Journal of Vector Ecology*, 42(1), 155-160.
- 883 Qi, Y. (2012). Random forest for bioinformatics. In *Ensemble machine learning* (pp. 307-323): Springer.
- 884 R development core team. (2018). R: A language and environment for statistical computing. Vienna,  
885 Austria: R Foundation for Statistical Computing. In.
- 886 Ramette, A. (2007). Multivariate analyses in microbial ecology. *FEMS Microbiology Ecology*, 62(2),  
887 142-160.
- 888 Reiskind, M. H., & Zarrabi, A. A. (2012). Water surface area and depth determine oviposition choice in  
889 *Aedes albopictus* (Diptera: Culicidae). *Journal of Medical Entomology*, 49(1), 71-76.
- 890 Reiter, P. (2007). Oviposition, dispersal, and survival in *Aedes aegypti*: implications for the efficacy of  
891 control strategies. *Vector-Borne and Zoonotic Diseases*, 7(2), 261-273.
- 892 Rose, N. H., Sylla, M., Badolo, A., Lutomiah, J., Ayala, D., Aribodor, O. B., . . . Mutebi, J.-P. (2020).  
893 Climate and urbanization drive mosquito preference for humans. *bioRxiv*.
- 894 Rundle, H. D., & Nosil, P. (2005). Ecological speciation. *Ecology Letters*, 8(3), 336-352.  
895 doi:10.1111/j.1461-0248.2004.00715.x
- 896 Schluter, D. (2000). *The ecology of adaptive radiation*: OUP Oxford.
- 897 Servedio, M. R., Van Doorn, G. S., Kopp, M., Frame, A. M., & Nosil, P. (2011). Magic traits in  
898 speciation: 'magic' but not rare? *Trends in Ecology & Evolution*, 26(8), 389-397.
- 899 Shafer, A., & Wolf, J. B. (2013). Widespread evidence for incipient ecological speciation: a meta-analysis  
900 of isolation-by-ecology. *Ecology Letters*, 16(7), 940-950.

- 901 Shannon, C. E. (1948). A mathematical theory of communication. *Bell system technical journal*, 27(3),  
902 379-423.
- 903 Simard, F., Nchoutpouen, E., Toto, J. C., & Fontenille, D. (2005). Geographic distribution and breeding  
904 site preference of *Aedes albopictus* and *Aedes aegypti* (Diptera: Culicidae) in Cameroon, Central  
905 Africa. *Journal of Medical Entomology*, 42(5), 726-731.
- 906 Soman, R. S., & Reuben, R. (1970). Studies on the preference shown by ovipositing females of *Aedes*  
907 *aegypti* for water containing immature stages of the same species. *Journal of Medical*  
908 *Entomology*, 7(4), 485-489.
- 909 Starrfelt, J., & Kokko, H. (2012). Bet-hedging—a triple trade-off between means, variances and  
910 correlations. *Biological Reviews*, 87(3), 742-755.
- 911 Strauss, S. Y., Cacho, N. I., Schwartz, M. W., Schwartz, A. C., & Burns, K. C. (2015). Apparency  
912 revisited. *Entomologia Experimentalis et Applicata*, 157(1), 74-85. doi:10.1111/eea.12347
- 913 Swan, T., Lounibos, L., & Nishimura, N. (2018). Comparative oviposition site selection in containers by  
914 *Aedes aegypti* and *Aedes albopictus* (Diptera: Culicidae) from Florida. *Journal of Medical*  
915 *Entomology*, 55(4), 795-800.
- 916 Sylla, M., Bosio, C., Urdaneta-Marquez, L., Ndiaye, M., & Black IV, W. C. (2009). Gene flow,  
917 subspecies composition, and dengue virus-2 susceptibility among *Aedes aegypti* collections in  
918 Senegal. *PLoS Neglected Tropical Diseases*, 3(4), e408.
- 919 Tabachnick, W. J., Munstermann, L. E., & Powell, J. R. (1979). Genetic distinctness of sympatric forms  
920 of *Aedes aegypti* in East Africa. *Evolution*, 287-295.
- 921 Tabachnick, W. J., & Powell, J. R. (1978). Genetic structure of the East African domestic populations of  
922 *Aedes aegypti*. *Nature*, 272(5653), 535.
- 923 Trpis, M., & Hausermann, W. (1975). Demonstration of differential domesticity of *Aedes aegypti*  
924 (L.)(Diptera, Culicidae) in Africa by mark-release-recapture. *Bulletin of Entomological Research*,  
925 65(02), 199-208.

- 926 Trpis, M., & Hausermann, W. (1978). Genetics of house-entering behaviour in East African populations  
927 of *Aedes aegypti* (L.)(Diptera: Culicidae) and its relevance to speciation. *Bulletin of*  
928 *Entomological Research*, 68(03), 521-532.
- 929 Vonesh, J. R., & Blaustein, L. (2010). Predator-induced shifts in mosquito oviposition site selection: a  
930 meta-analysis and implications for vector control. *Israel Journal of Ecology and Evolution*, 56(3-  
931 4), 263-279.
- 932 Wong, J., Stoddard, S. T., Astete, H., Morrison, A. C., & Scott, T. W. (2011). Oviposition site selection  
933 by the dengue vector *Aedes aegypti* and its implications for dengue control. *PLoS Negl Trop Dis*,  
934 5(4), e1015.
- 935 Wong, J., Stoddard, S. T., Astete, H., Morrison, A. C., & Scott, T. W. (2011). Oviposition site selection  
936 by the dengue vector *Aedes aegypti* and its implications for dengue control. *PLoS Neglected*  
937 *Tropical Diseases*, 5(4), e1015. doi:10.1371/journal.pntd.0001015
- 938 Yee, D. A., Allgood, D., Kneitel, J. M., & Kuehn, K. A. (2012). Constitutive Differences Between  
939 Natural and Artificial Container Mosquito Habitats: Vector Communities, Resources,  
940 Microorganisms, and Habitat Parameters. *Journal of Medical Entomology*, 49(3), 482-491.  
941 doi:10.1603/me11227
- 942 Zahiri, N., & Rau, M. E. (1998). Oviposition attraction and repellency of *Aedes aegypti* (Diptera:  
943 Culicidae) to waters from conspecific larvae subjected to crowding, confinement, starvation, or  
944 infection. *Journal of Medical Entomology*, 35, 782-787.
- 945 Zahiri, N., Rau, M. E., & Lewis, D. J. (1997). Oviposition responses of *Aedes aegypti* and *Ae. atropalpus*  
946 (Diptera: Culicidae) females to waters from conspecific and heterospecific normal larvae and  
947 from larvae infected with *Plagiorchis elegans* (Trematoda: Plagiorchiidae). *Journal of Medical*  
948 *Entomology*, 34(5), 565-568.
- 949 Zahiri, N., Rau, M. E., & Lewis, D. J. (1997). Starved larvae of *Aedes aegypti* (Diptera: Culicidae) render  
950 waters unattractive to ovipositing conspecific females. *Environmental Entomology*, 26(5), 1087-  
951 1090.



952

953 **Tables**

954 **Table 1.** Number of oviposition sites measured for different environmental variables

| Field site location | Habitat                   | <i>Aedes aegypti</i> | Physical characteristics | Larval density | Microbial density | Bacteria composition | Volatile profile |
|---------------------|---------------------------|----------------------|--------------------------|----------------|-------------------|----------------------|------------------|
| La Lopé,<br>Gabon   | Forest                    | Present              | 5                        | 5              | 5                 | 5                    | na*              |
|                     |                           | Absent               | 48                       | 55             | 10                | 33                   | na*              |
|                     | Peridomestic<br>(Village) | Present              | 13                       | 13             | 10                | 10                   | na*              |
|                     |                           | Absent               | 24                       | 25             | 12                | 23                   | na*              |
|                     | <b>Total</b>              |                      | 90                       | 98             | 37                | 71                   | na*              |
| Rabai,<br>Kenya     | Forest                    | Present              | 15                       | 15             | 15                | 15                   | 7                |
|                     |                           | Absent               | 22                       | 22             | 11                | 22                   | 12               |
|                     | Peridomestic<br>(Village) | Present              | 8                        | 8              | 8                 | 8                    | 5                |
|                     |                           | Absent               | 1                        | 1              | 1                 | 1                    | 1                |
|                     | Domestic<br>(Village)     | Present              | 22                       | 22             | 22                | 22                   | 17               |
|                     | <b>Total</b>              |                      | 68                       | 68             | 57                | 68                   | 42               |

955 \* Headspace volatiles were not collected in La Lopé, Gabon.

956

957

958 **Figures**

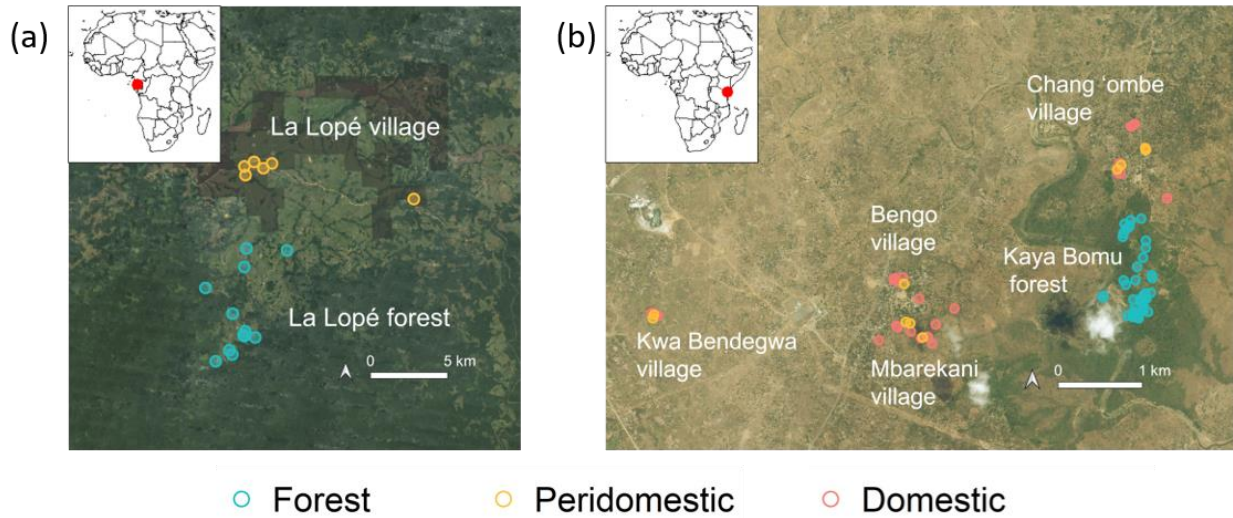

959

960 **Figure 1.** Sampling locations in (a) La Lopé, Gabon, and (b) Rabai, Kenya. The inset in each graph  
 961 shows the location of the field site in continental Africa. In (a), each point represents a sampling site  
 962 where one to multiple oviposition sites were found. In (b), each point represents a single oviposition site.  
 963 The color of the point indicates the habitat category: red points are domestic (village indoor) sites, yellow  
 964 points are peridomestic sites (village outdoor), and green points are forest sites. The satellite image were  
 965 from (a) Google Satellite and (b) Bing Satellite in QGIS, respectively.

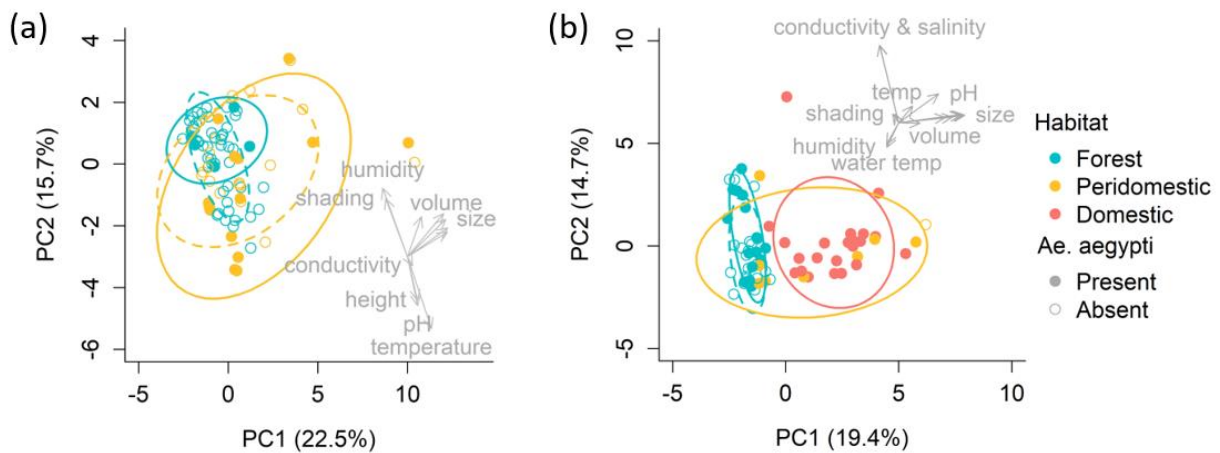

966

967 **Figure 2.** Principal component analysis (PCA) of all physical variables in (a) La Lopé and (b) Rabai. The  
968 first two PCs are shown, and the variance explained by each PC was indicated in the axis label. Each  
969 point represents a single oviposition site. Colors and point shapes indicate habitat and whether *Ae. aegypti*  
970 were found in the sites, respectively. An eclipse was drawn for each oviposition site group with a 75%  
971 confidence level. The colors of the eclipses represent habitat types and match the colors of the points. The  
972 solid and dashed eclipses correspond to *Ae. aegypti* present and absent sites. The original variables were  
973 overlaid on the PC1-PC2 plate with major variables labeled.

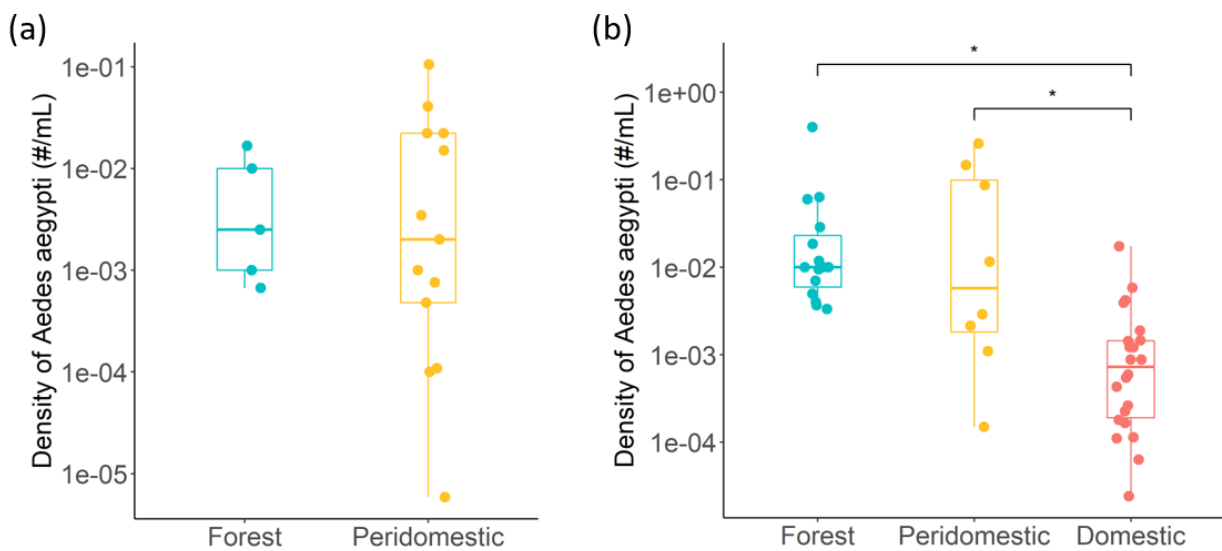

974  
975 **Figure 3.** Comparison of *Ae. aegypti* density between habitats in (a) La Lopé and (b) Rabai. Only  
976 oviposition sites present with *Ae. aegypti* were included. Each point represents a single oviposition site.  
977 The color and shape are as in Figure 2. The boxplots show the minimum, 25% quartile, median, 75%  
978 quartile, and maximum. Differences between habitats were tested using pairwise Wilcoxon rank sum test  
979 with *Holm* multiple comparison corrections (\*:  $p < 0.05$ , Table S4-S6).

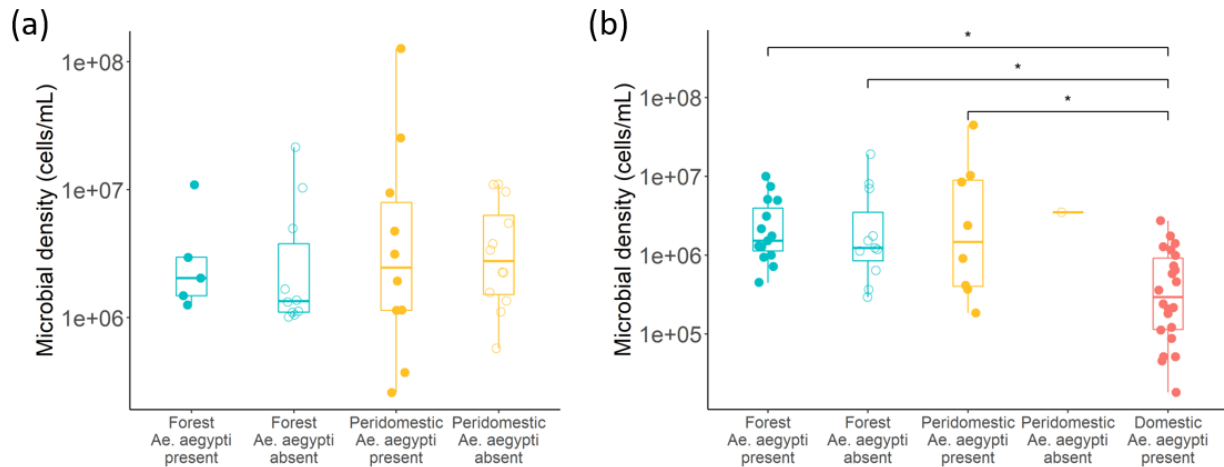

980

981 **Figure 4.** Comparison of microbial density between oviposition site groups in (a) La Lopé and (b) Rabai.

982 Each point represents an oviposition site. The color and shape are as in Figure 2. Differences between

983 groups were tested using pairwise Wilcoxon rank sum test with *Holm* multiple comparison correction (\*:

984  $p < 0.05$ , Table S3-S6).

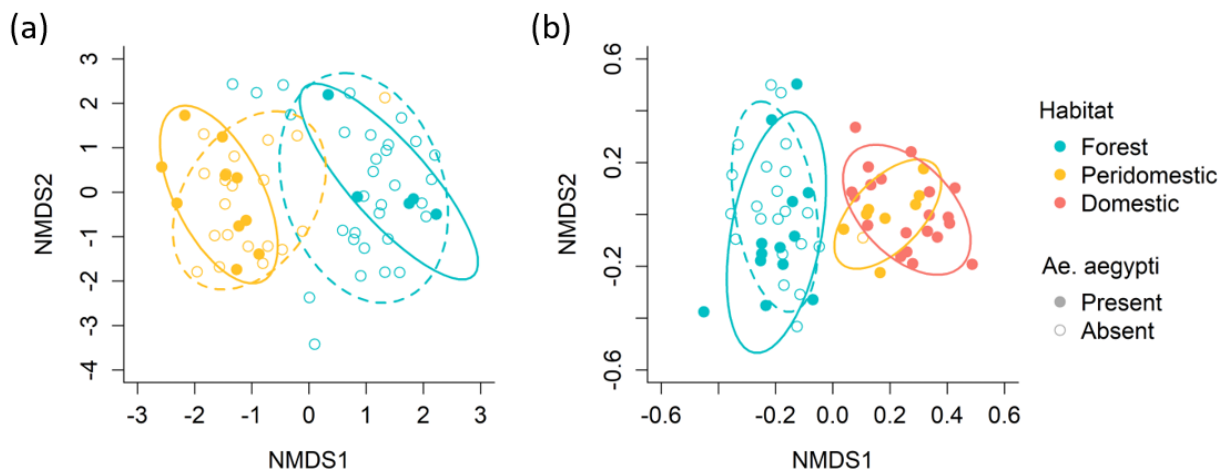

985

986 **Figure 5.** NMDS analysis of bacterial community compositions in oviposition sites in (a) La Lopé and (b)

987 Rabai. The analysis was performed with the amplicon sequencing results at the sequencing variants

988 (ASVs) level. Each point represents an oviposition site. The color and shape of points, as well as the

989 ellipses, are the same as in Figure 2.

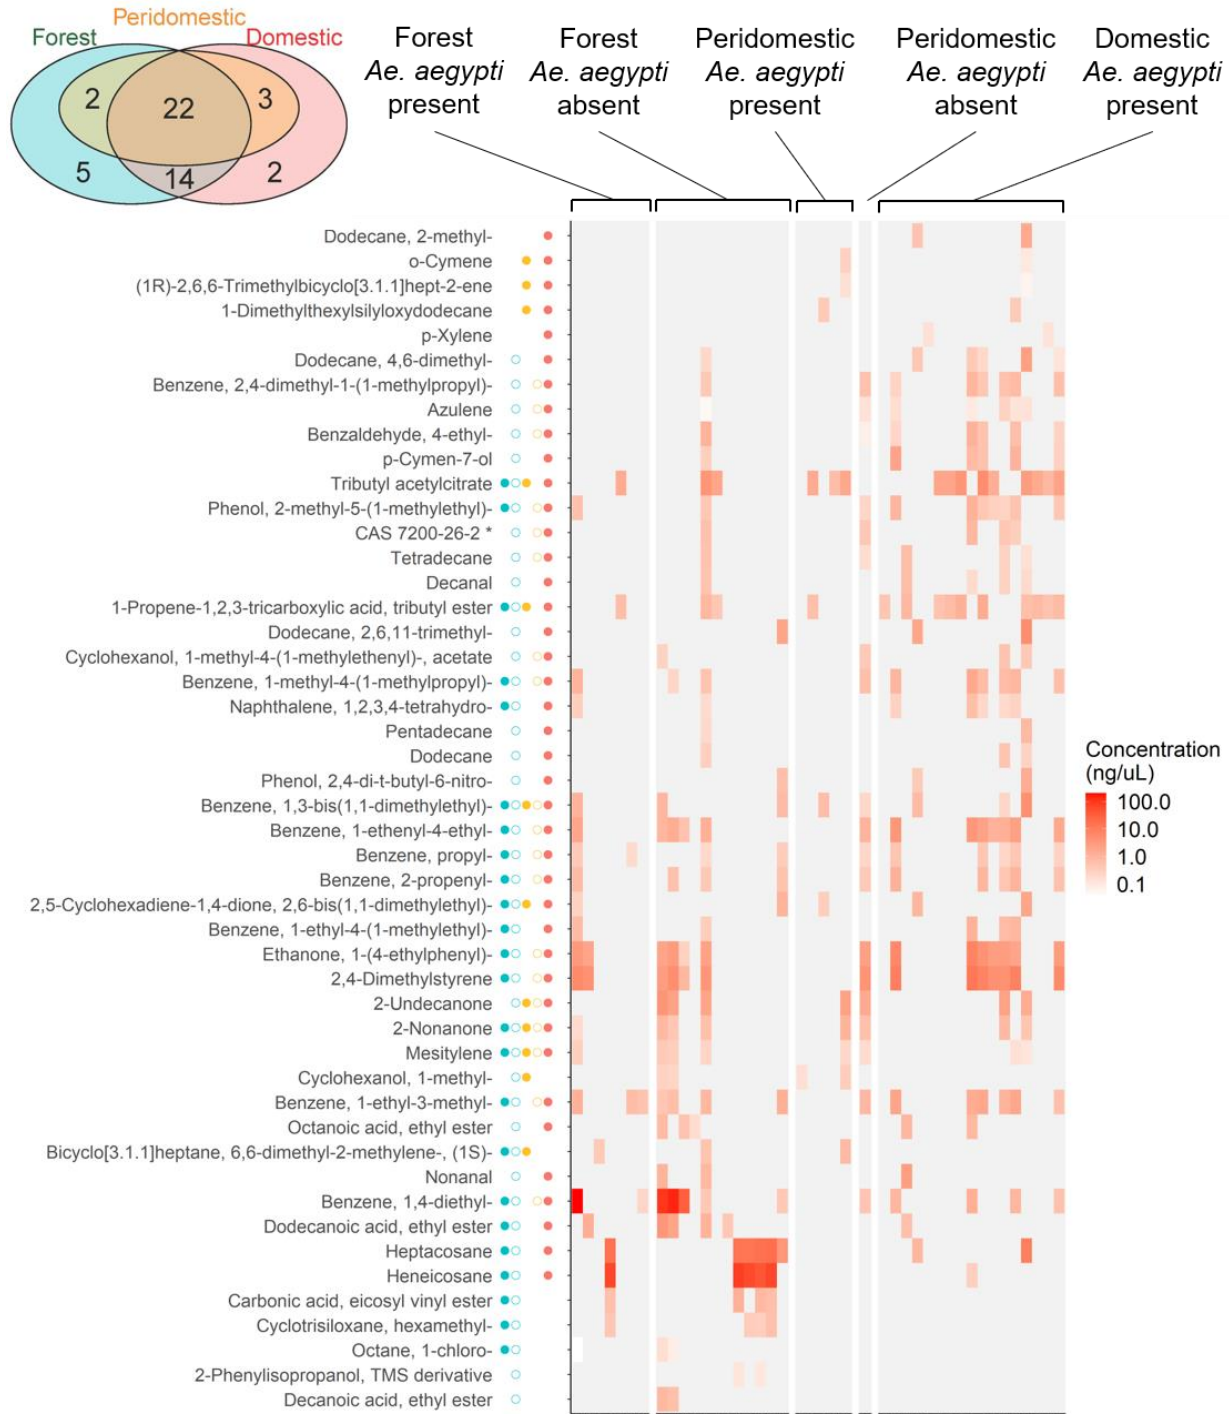

990

991 **Figure 6.** Chemical profile of the volatile samples collected from Rabai oviposition sites. Each row  
 992 represents a compound, and each column represents an oviposition site. The compound CAS 7200-26-2 is  
 993 Oxirane, 2,2-dimethyl-3-(3,7,12,16,20-pentamethyl-3,7,11,15,19-heneicosapentaenyl)-, (all-E)-. The five  
 994 columns of points between the compound names and the heatmap summarize whether the compounds are

995 present in each of the five oviposition site groups. The color and shape of points are the same as in Figure  
996 2. The color of each cell in the heatmap quantifies the concentration on a log scale. Gray cells indicate  
997 that the compound was not found in the oviposition sites according to the GC-MS results. The inset Venn  
998 diagram shows the total numbers of compounds unique in each habitats or shared between different  
999 habitats.

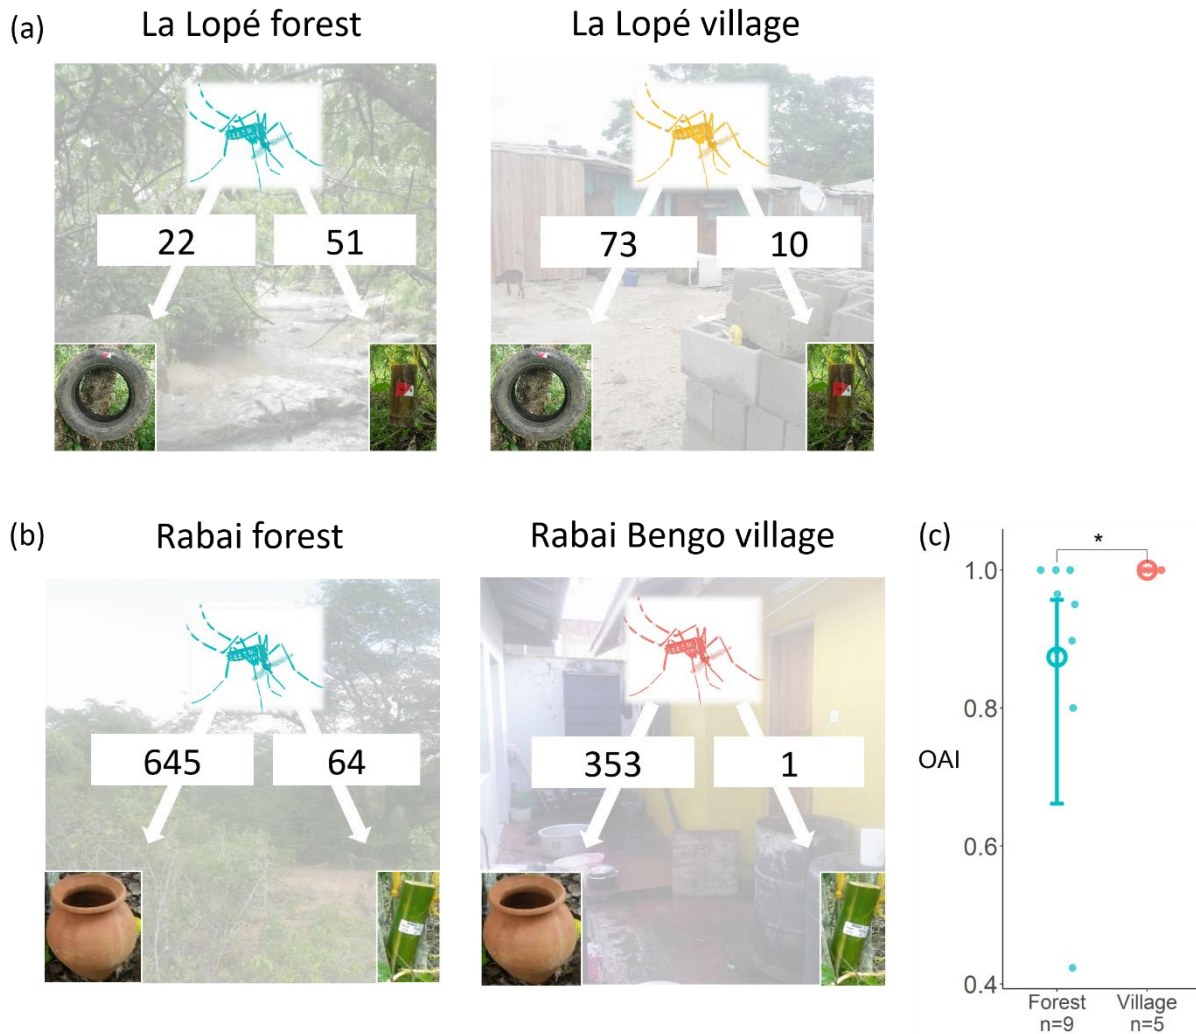

1000

1001 **Figure 7.** Field oviposition choice experiments in (a) La Lopé and (b) Rabai. Artificial containers and  
1002 bamboo segments (inset photos as examples) were placed in both the forest and the villages. The numbers  
1003 in (a) and (b) are the total numbers of *Ae. aegypti* produced by the two types of containers in the two  
1004 habitats. In Rabai, the ten replicates of container pairs in each habitat were examined separately. An OAI

1005 was calculated for each container group that had no fewer than ten *Ae. aegypti*, as shown by points in (c).  
 1006 Larger OAI implies more *Ae. aegypti* from artificial containers. The hollow circles and error bars show  
 1007 the mean OAI and a 95% confidence interval estimated by a beta-binomial model with habitats as the  
 1008 predictor. The model was significantly better than a null model, which suggested a significant difference  
 1009 between habitats (\*:  $p < 0.05$ ).

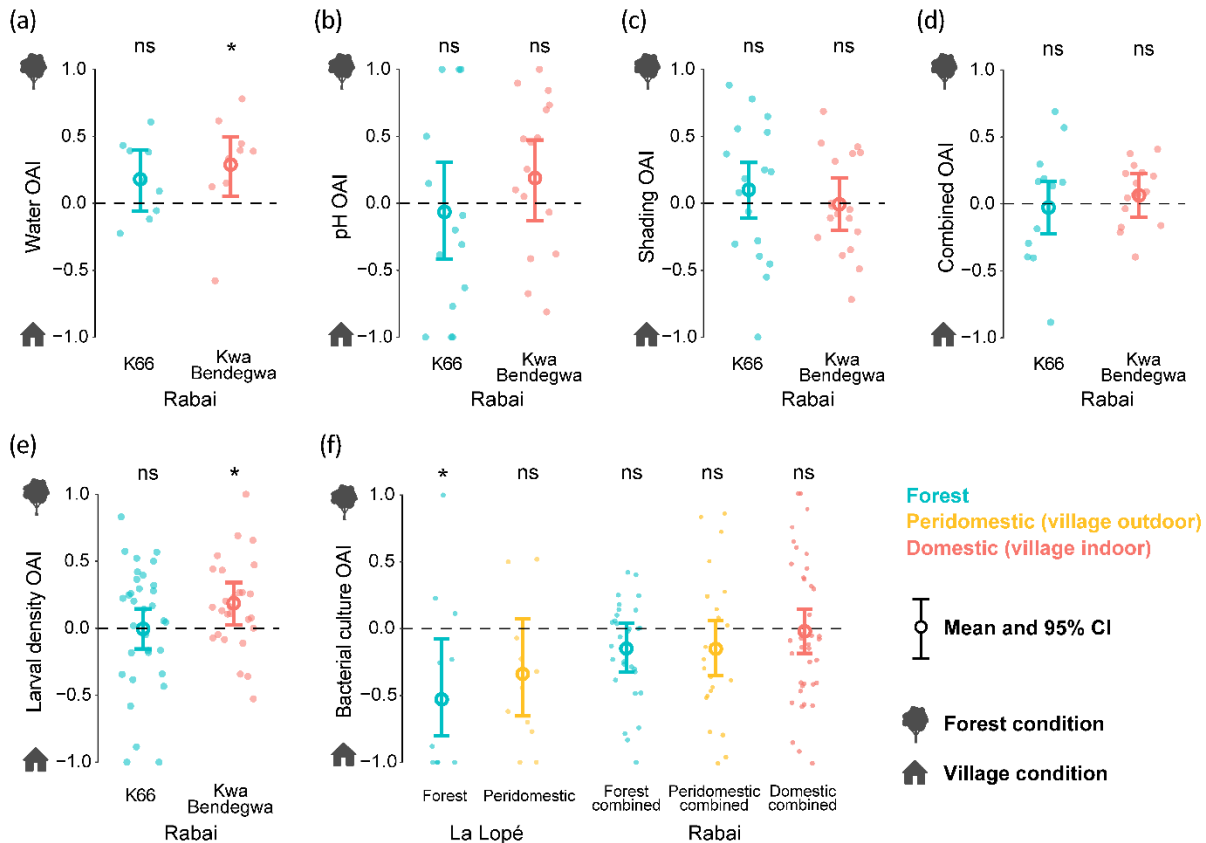

1010

1011 **Figure 8.** Two-choice laboratory oviposition assays testing preference for field-collected waters, pH,  
 1012 shading, a combination of water pH, salinity and shading, *Ae. aegypti* larval density, and bacterial culture.  
 1013 Colony-wise results are shown in Figure S14 in the Appendix. The details of the two choices in each  
 1014 assay were described in Table S2 in the Appendix. Higher OIA implies a preference for the forest  
 1015 condition. Each point represents the OAI of one cage with five gravid females. The mean and 95%  
 1016 confidence interval (CI) were estimated by beta-binomial models. The asterisks and ‘ns’ above each

1017 colony indicates whether the 95% CI excludes zero. No significant differences were found between habitats  
1018 or between colonies in any experiments.

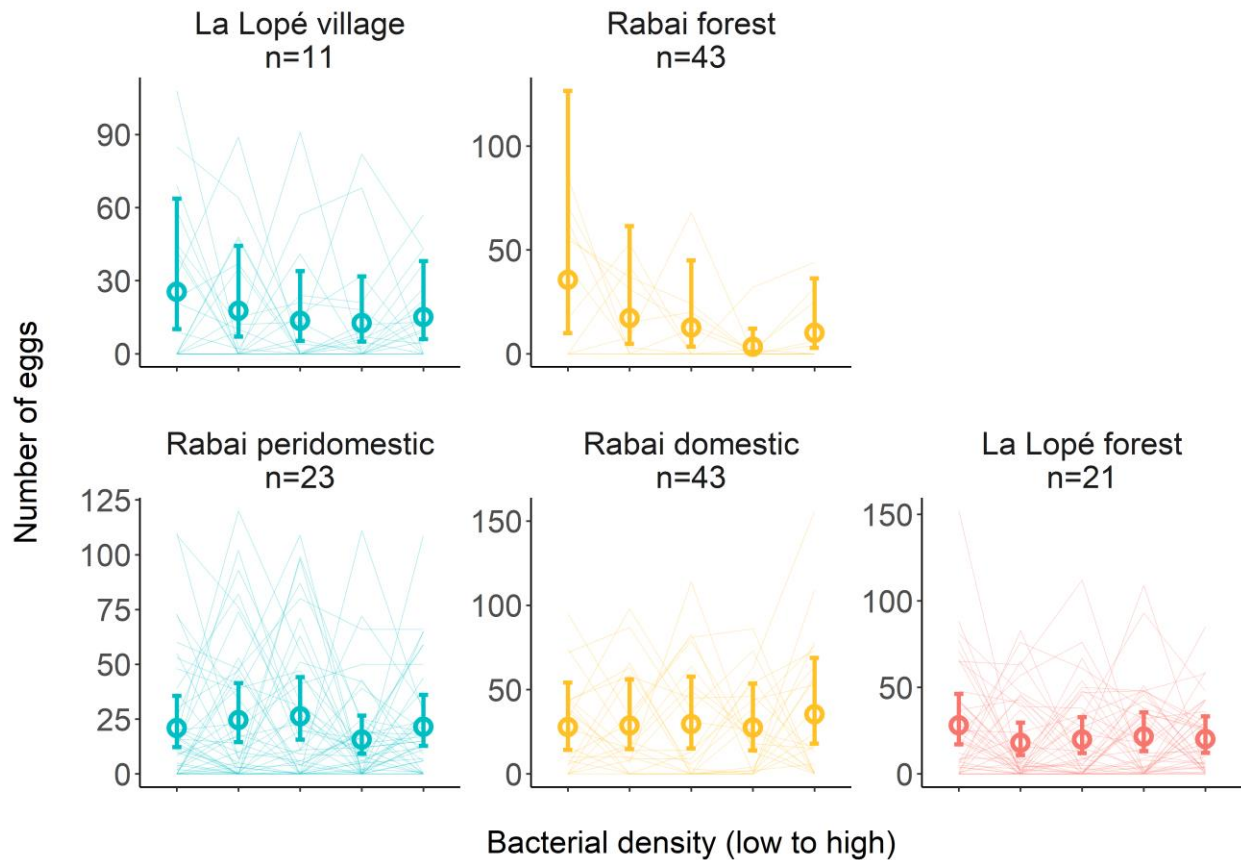

1019

1020 **Figure 9.** Five-choice laboratory oviposition assays testing preference for bacterial density. Five cups  
1021 were provided in each cage with increasing bacterial density at 0,  $2 \times 10^5$ ,  $1 \times 10^6$ ,  $5 \times 10^6$ ,  $2.5 \times 10^7$  cells/mL  
1022 (details in Table S2), which correspond to the five columns (left to right) in each panel. Each line  
1023 connects the five egg counts in one cage. Colors represent the habitats from where the colonies came.  
1024 Multiple colonies from the same habitat in Rabai were combined in this figure. Colony-wise results are  
1025 shown in Figure S15 in the Appendix. A negative-binomial model was used to fit the results of each  
1026 oviposition assay. The model estimates the mean number of eggs in each bacterial density and a 95%  
1027 confidence interval, which are shown by the open circles and the error bars, respectively.

1028



1029 **Data Accessibility Statement**

1030 The datasets that describe the basic information, physical characteristics, larval density, predator  
1031 presence, microbial density, and chemical profile of oviposition sites in La Lopé and Rabai are archived  
1032 in Dryad: doi:10.5061/dryad.7m0cfxprg (La Lopé) and doi:10.5061/dryad.3tx95x6cz (Rabai), respectively.  
1033 The 16s-rRNA gene amplicon sequencing data was deposited in the NCBI SRA database with ID  
1034 SUB7716639 (La Lopé samples) and SUB7719551 (Rabai samples).

1035

1036 **Competing Interests Statement**

1037 The authors declare that they have no competing interests.

1038

1039 **Author contributions**

1040 SX and JRP designed and conceptualized the study. SX, DA, RS, JL, CSM, NHR, and JRP coordinated  
1041 the fieldwork. SX, DA, and JL conducted field sampling of oviposition sites and field oviposition  
1042 experiments. SX and HD designed the volatile collection in Rabai and performed the GC-MS analysis.  
1043 SX performed the lab work to generate the data on microbial density and bacterial community  
1044 composition. SX, CSM, and NHR established mosquito colonies, and SX performed the laboratory  
1045 oviposition assays. SX wrote the first draft of the manuscript. JRP provided funding, coordinated the  
1046 entire study, and interpreted results with SX. All authors provided critical feedback on the manuscript.

1047

1048 **Acknowledgments**

1049 We appreciate the collaboration and the support from Institut de Recherche pour le Développement (IRD)  
1050 and the research Unit ESV-GAB at the Centre International de Recherches médicales de Franceville

1051 (CIRMF) in Gabon, and Kenya Medical Research Institute (KEMRI) in Kenya during the fieldwork. We  
1052 are grateful to all the field assistants and scientists in the field, especially Nil Rahola and Marc F.  
1053 Ngangué in La Lopé and Rotich Gilbert in Rabai. In addition, we thank Andrew Goodman and his lab for  
1054 providing primers for bacterial amplicon sequencing and helpful guidance in library preparation. We also  
1055 thank Nanxi Lu for the instructions on bioinformatic analysis of the sequencing results. We received a lot  
1056 of technical support and training from the Yale Center for Genome Analysis (YCGA) on Illumina  
1057 sequencing, from the West Campus Analytic Core on GC-MS, and from the Yale West Campus Imaging  
1058 Core on fluorescent microscopes and we are grateful for all the support. The design of the laboratory  
1059 experiments benefited greatly from the helpful discussions with Luciano Cosme, Ryan Joseph, Lisa Baik,  
1060 and Noah Rose. We appreciate all the useful discussions, suggestions, and feedback from Gisella  
1061 Caccone, Tom Chiodo, Benjamin Evans, Stephen Gaughran, Andrea Gloria-Soria, Evelyn Jensen,  
1062 Panagiota Kotsakiozi, Joshua Miller, Evlyn Pless, Maud Quinzin, Norah Saarman, Samuel Snow, and  
1063 John Soghigian. We also want to thank the McBride lab at Princeton University for valuable feedback and  
1064 discussions. Lastly, we are very grateful for the advice and guidance from Stephen Stearns, John Carlson,  
1065 and Alvaro Sanchez.

1066 This work was supported by NIH RO1 AI101112 to JRP and YIBS Small Grants Program, Doctoral  
1067 Dissertation Improvement Awards to SX.
